# Supplementary material for: Simultaneous shipborne measurements of CO 2 , CH 4 and CO and their application to improving greenhouse gas flux estimates in Australia
Source: Copernicus journal article supplement (doi:10.5194/acp-2018-1284), 2019-01-08
Supplement: Supplementary file [file acp-2018-1284-AC2-supplement.pdf]

## **Authors Response Reviewer 2 - Simultaneous shipborne measurements of CO<sub>2</sub>, CH<sub>4</sub> and CO and their application to improving greenhouse gas flux estimates in Australia**

Beata Bukosa<sup>1</sup>, Nicholas M. Deustcher<sup>1</sup>, Jenny A. Fisher<sup>1</sup>, Dagmar Kubistin<sup>1,2</sup>, Clare Paton-Walsh<sup>1</sup>, David W.T. Griffith<sup>1</sup>

<sup>1</sup> School of Earth, Atmospheric, and Life Sciences, University of Wollongong, NSW, Australia

<sup>2</sup> German Meteorological Service, Meteorological Observatory Hohenpeissenberg, Hohenpeissenberg, Germany

*Correspondence to:* Beata Bukosa (bb907@uowmail.edu.au)

We would like to thank the reviewer for the comments and suggestions. Below we have provided a response to each comment along with any subsequent changes to the manuscript. The original review is in bold and our responses are in normal font. Please, find the revised manuscript at the end of this document.

### **General Comments**

- 1. Framing the analysis:** The bulk of the paper is very descriptive, and much of the text works through the data explaining the processes driving each individual ship transect. It is hard work for the reader to find they key scientific findings of the study, and Im concerned the paper will not attract the readership it deserves. The authors need to identify a few key results they wish to highlight, and re-focus their discussion of the data on what they need to tell that story. One approach would be to re-write section 4, so that instead of the analysis going through cruise by cruise, the description focuses instead on what is learned about the key source/sink processes (e.g. fire, fossil, wetlands, etc.) These processes could then have their own sub-sections, to help guide the reader. Then, I would recommend better highlighting the importance and power of the co-enhancements explored in section 6 in the abstract, introduction, and conclusions, to bring this interesting analysis forward a bit. Please take this only as an example of how I might approach the problem, as there are a few equally valid paths the authors could take to focus the paper.

We thank the reviewer for this comment. We agree and have now modified the Abstract, Introduction, Conclusion and parts of Section 6 to highlight the importance of the co-enhancements for source and sink attribution. We have also modified Section 4, shortened the discussion and separated into anthropogenic sources, natural sources and background regions. Please, find the revised manuscript and modifications at the end of this document

- 2. Incomplete use of data:** I was surprised that the authors made no use of any of the land-based greenhouse gas measurements available during this time through CSIROs observing network or TCCON. It is reasonable for the paper to focus on what is learned from the new ship data, but the other long-term data could be a powerful point of comparison.

Our original goal was to integrate all the measurements mentioned by the reviewer; however, we made the decision to focus exclusively on the measurements from the ship voyages because (1) the analysis was

becoming too complex and the (already lengthy) manuscript started to lose focus (2) the main two fixed location sites closest to the ship tracks (Darwin and Wollongong) that have both surface and TCCON measurements lacked surface measurements during the time period of the ship cruises, which limited our ability to use the data together to constrain the sources and sinks. However, we do plan to build on these results in future and additionally explore both the surface and column measurements from other sites in Australia, especially the two sites (Wollongong and Darwin) that have both column (TCCON) and surface measurements.

- 3. Emissions fields: The authors have chosen emission fields that, in many cases, do not extend through the time period they wish to simulate (2012-2013), even when more updated fields are available. For example, why use EDGAR 4.2, which ends in 2008, when EDGAR 4.3 continues to 2012 and has been available since 2017? Why use net terrestrial exchanges from TansCom circa 2006, when biosphere estimates from a variety of land models and inverse models are available publicly? I dont think this is likely to cause a fundamental change in the findings, but it is always best practice to use up to date information where possible.**

While it would have been ideal to use more up to date information for some emissions, we were limited by which inventories had already been implemented in GEOS-Chem at the time we ran our simulations. Not all emission inventories are inherently compatible with GEOS-Chem, and it is non-trivial to modify the model to use new emission inventories that have not already been tested in the model. We also prioritised using the same inventories for all three species where possible. For example, while EDGAR 4.3 was partially implemented into the CH<sub>4</sub> simulation (with caveats, [http://wiki.seas.harvard.edu/geos-chem/index.php/CH4\\_simulation](http://wiki.seas.harvard.edu/geos-chem/index.php/CH4_simulation)) it was not yet implemented in the CO simulation so we used version 4.2.

- 4. Publication of the data: This manuscript is built upon a measurements campaign, which the authors say will be described in a forthcoming paper by Kubistin et al. I have a high degree of confidence in the capabilities of the measurement team for this work. However, there is a risk in accepting a paper that is underpinned by another manuscript, before that manuscript is fully peer reviewed or accepted.**

While measurements from the ship voyages will be presented in more detail in the forthcoming paper by Kubistin et al. (2019), we were careful to include essential information in our paper about the specifications of the instrument used for the measurement collection (e.g. repeatability, accuracy), and we discuss both the measurement collection and calibration process (e.g. reference gases in Section 2). Moreover, the instrument used for the measurements is already fully described in Griffith et al. (2012). We feel therefore that our paper stands on its own without the need for the forthcoming ESSD paper by Kubistin et al. (2019). The Kubistin et al. paper will nevertheless complement this paper and is in the final stages of preparation before submission to ESSD in Q2 2019.

#### Minor Comments

- 5. Introduction: For multi-species studies such as this one, I think it is very helpful to show a table of source/sink processes, highlighting which gases are affected by the**

**source/sink. This way, the reader sees immediately what the common threads are, even if they dont know a specific gas particularly well**

Agreed, and the purpose of having all the source and sink fields used by the model for all three gases next to each other in Table 1 (Page 4) was exactly for this reason. We have now additionally highlighted this by adding a sentence in the Introduction: "Table 1 highlights the source and sink fields that are common between the three gases. (Page 2 Line 34-35)).

**6. Introduction: There is a strong focus in the introduction on the importance of Australian fluxes in driving global inter-annual variability in greenhouse gases. However, this paper doesnt shed a lot of light on inter-annual variability. Instead, it is a strong example of how in-depth analysis across multiple trace gases can be a powerful tool in source/sink attribution. I recommend re-framing the introduction this way, to attract the readers that are most likely to be enthusiastic about this work.**

We have now re-framed the Introduction by removing the discussion about the interannual variability and focused more on multiple tracer gas studies for source and sink attribution (Page 1, 2 and 3).

**7. Page 5, line 10. The introduction spent so much time talking about inter-annual variability in Australian fluxes, it seems strange to read here that you think this isnt going to cause much error to use repeating fluxes in your model simulations. In the introduction, the authors highlight the strong variability in greenhouse gas fluxes from Australia. It feels a little strange to read here that the variability to**

We have now clarified and expanded this statement with specific examples why we think that for our measurement time period the repeating fluxes will not introduce a large error in the results (Page 6, Line 5-14) even if a significant interannual variability of these gases was observed in the past for the Australian region.

**8. Figures 6 and 8 are the most exciting results figures of the paper, yet they are quite small and difficult to read. Suggest sizing them up.**

We have now modified the figure sizes (Figure 6, Page 13 and Figure 8, Page 16)

**9. There were a few ?? left over from the LaTeX formatting. Be sure to check and resolve these.**

These issues are now resolved.

#### **Additional Author's Comment**

In addition to all the reviewer's suggestions, we have removed the results for the CO<sub>2</sub> chemical source in the paper, since we have discovered an error with the treatment of this source in the GEOS-Chem simulation. Since the chemical source is distributed throughout the troposphere, its impact on our results for surface air is minimal. We have removed this source from Figure 6 and Table 1 in the main text and Figure S6 and Table S5 in the Supplement. We have also removed this source from the model description (Page 6 line 17). Figure 1, below, shows the surface concentration of the CO<sub>2</sub> chemical source relative to a major (fossil fuel) and a minor (biofuel) source, showing that the magnitude of this source type is low relative to other sources at the surface.

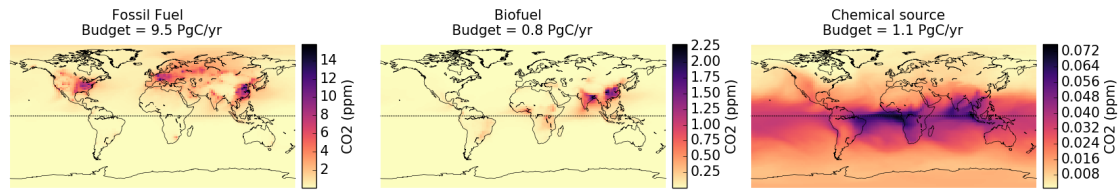

Figure 1: Surface concentrations of CO<sub>2</sub> from fossil fuel, biofuel emissions and chemical production. Note the different colour scales for the three panels.

## References

Griffith, D., Deutscher, N., Caldw, C., Kettlewell, G., Riggenbach, M., and Hammer, S.: A Fourier transform infrared trace gas and isotope analyser for atmospheric applications, *Atmospheric Measurement Techniques*, 5, 2481–2498, 2012.

# Simultaneous shipborne measurements of CO<sub>2</sub>, CH<sub>4</sub> and CO and their application to improving greenhouse gas flux estimates in Australia

Beata Bukosa<sup>1</sup>, Nicholas M. Deutscher<sup>1</sup>, Jenny A. Fisher<sup>1</sup>, Dagmar Kubistin<sup>1,2</sup>, Clare Paton-Walsh<sup>1</sup>, and David W. T. Griffith<sup>1</sup>

<sup>1</sup>School of Earth, Atmospheric, and Life Sciences, University of Wollongong, NSW, Australia

<sup>2</sup>German Meteorological Service, Meteorological Observatory Hohenpeissenberg, Hohenpeissenberg, Germany

*Correspondence to:* Beata Bukosa (bb907@uowmail.edu.au)

**Abstract.** Quantitative understanding of the sources and sinks of greenhouse gases is essential for predicting greenhouse gas-climate feedback processes and their impacts on climate variability and change. Australia plays a significant role in driving variability in global carbon cycling, but the budgets of carbon gases in Australia remain highly uncertain. Here, shipborne Fourier Transform Infrared Spectrometer measurements collected around Australia are used together with a global chemical transport model (GEOS-Chem) to analyse the variability of three direct and indirect carbon greenhouse gases: carbon dioxide (CO<sub>2</sub>), methane (CH<sub>4</sub>) and carbon monoxide (CO). Using these measurements, we provide an updated distribution of these gases. From the model we quantify their sources and sinks and we exploit the benefits of multi-species analysis to explore co-variations to constrain relevant processes. We find that for all three gases, the east Australian coast is largely influenced by local anthropogenic sources while the south, west and north coasts are characterised by a mixture of anthropogenic and natural sources. Comparing coincident and co-located enhancements in the three carbon gases highlighted several common sources from the Australian continent. We found evidence for 17 events with similar enhancement patterns indicative of co-emission and calculated enhancements ratios and modelled source contributions for each event. We found that anthropogenic co-enhancement events are common along the east coast, while co-enhancement events in the tropics primarily derive from biomass burning sources. While the GEOS-Chem model generally reproduced the timing of co-enhancement events, it was less able to reproduce the magnitude of enhancements. We used these differences to identify underestimated, overestimated and missing processes in the model. We found model overestimates of CH<sub>4</sub> from coal burning and underestimates of all three gases from biomass burning. We identified missing sources from fossil fuel, biofuel, oil, gas, coal, livestock, biomass burning and the biosphere in the model, pointing to the need to further develop and evaluate greenhouse gas emission inventories for the Australian continent.

## 20 1 Introduction

Carbon greenhouse gas emissions to the atmosphere have grown dramatically over the last 250 years, with resulting impacts for climate. Before the industrial revolution, these gases were primarily controlled by natural processes, but since industrialization

anthropogenic processes have played an increasingly important role in determining greenhouse gas budgets. This change has increased the complexity of the greenhouse gas-climate feedback and the uncertainties related to these feedbacks and processes. Carbon dioxide (CO<sub>2</sub>) and methane (CH<sub>4</sub>) are the most significant greenhouse gases arising from anthropogenic activities. Carbon monoxide (CO) is an indirect greenhouse gas that, through its reaction with the hydroxyl radical (OH), affects the atmospheric burdens of CH<sub>4</sub> and tropospheric ozone. The Australian continent has been shown to critically influence the interannual variability of carbon cycling on a global scale (Poulter et al., 2014; Ma et al., 2016), yet the budgets of these gases in Australia remain poorly constrained. Here, we use shipborne observations of CO<sub>2</sub>, CH<sub>4</sub>, and CO to provide an updated estimate of their spatial distribution, sources and sinks, with a focus on common processes and sources that lead to co-variation between species.

There have been several prior attempts to identify source contributions to Australian greenhouse gas budgets. The terrestrial biosphere is thought to be the largest driver of both column and surface CO<sub>2</sub> variability in Australia, followed by biomass burning (Deutscher et al., 2014; Buchholz et al., 2016). For CH<sub>4</sub>, emissions from ruminant animals are a significant Australian source, particularly at clean air sites (Dalal et al., 2008; Fraser et al., 2011). Local emissions from animals are also present in urban areas, along with coal mining, biomass burning and wetland emissions. Wetlands are particularly important in the tropics where their emissions dominate (Deutscher et al., 2010). For CO, biomass burning plays an important role as the main driver of the CO seasonal and interannual variability across the southern hemisphere (Edwards et al., 2006a, b). Overall, total CO in Australia is dominated by non-methane volatile organic carbon (NMVOC) and CH<sub>4</sub> oxidation (Té et al., 2016; Fisher et al., 2017), with negligible influence from anthropogenic emissions (Zeng et al., 2015). While prior work has provided some constraints on Australia's greenhouse gas sources, both these studies and others have shown lingering differences between modelled and measured concentrations, implying some sources of greenhouse gases in Australia remain missing or underestimated (Fraser et al., 2011; Loh et al., 2015).

Long range transport and interhemispheric exchange additionally influence the abundances of CO<sub>2</sub>, CH<sub>4</sub> and CO in Australia and confound measurement interpretation. The Intertropical Convergence Zone (ITCZ) and chemical equator (Hamilton et al., 2008) serve as a barrier to mixing between the more polluted northern hemisphere and cleaner southern hemisphere air (Stehr et al., 2002). During austral summer the ITCZ stretches across northern Australia, which chemically becomes part of the northern hemisphere, and during the austral monsoon season the chemical equator separates from the ITCZ north of Australia. South of the ITCZ, anthropogenic and biomass burning emissions are readily transported to northern Australia from Indonesia and Southeast Asia (Gregory et al., 1999; Paton-Walsh et al., 2010; Fraser et al., 2011; Yashiro et al., 2009). Southeast Australia is also affected by zonal transport of biomass burning emissions, from southern Africa and South America (Jones et al., 2001; Edwards et al., 2006a; Zeng et al., 2012).

While most prior work on greenhouse gas source attribution in Australia has focused on a single species, measurements of co-variation between species can provide useful constraints on controlling processes (Andreae and Merlet, 2001; Popa et al., 2014). CO<sub>2</sub>, CH<sub>4</sub> and CO are chemically dependent, with several common sources and sinks, and changes in any one of these species can have a significant impact on the others. Table 1 highlights the source and sink processes that are common between the three gases. Both CO and CH<sub>4</sub> are removed through reaction with OH, the main tropospheric oxidant, leading to

production of CO<sub>2</sub> (McConnell et al., 1971; Hewitt and Harrison, 1985; Enting and Mansbridge, 1991; Duncan et al., 2007). CH<sub>4</sub> oxidation leads to a near unity production of CO (Duncan et al., 2007), and CO oxidation is responsible for about 90% of the chemical production of CO<sub>2</sub> (Ciais et al., 2008; Folberth et al., 2005). All three gases are emitted during fossil fuel and biomass combustion. Because of these co-emissions that lead to coincident enhancements, ratios between the different gases can be used to identify the signature of sources including coal mining (Buchholz et al., 2016), household combustions (Zhang et al., 2000), traffic (Ammoura et al., 2014) and biomass burning (Nara et al., 2011; Parker et al., 2016; Lawson et al., 2015; Guérette et al., 2018). Nonetheless, few studies have exploited the benefits of multi-species analysis to explore co-variations and constrain relevant source and sink processes of CO<sub>2</sub>, CH<sub>4</sub> and CO in Australia.

In this study, we use 6 months of observations from 2012-2013 collected onboard a ship that circumnavigated Australia (Sect. 2), combined with a chemical transport model (GEOS-Chem, Sect. 3), to quantify the distributions of CO<sub>2</sub>, CH<sub>4</sub> and CO around Australia (Sect. 4). We investigate the role of different sources and sinks in driving the variability of these gases (Sect. 5) by identifying a series of events when we observed simultaneous enhancements in at least two of the three gases. Finally, we use these enhancements and their co-variations to identify the dominant processes driving carbon gas variability in Australia and to identify the sources that remain missing or underestimated in the GEOS-Chem model (Sect. 6).

## 2 Measurements

CO<sub>2</sub>, CH<sub>4</sub> and CO were measured aboard the Australian research vessel Southern Surveyor operated by CSIRO/MNF (Commonwealth Scientific and Industrial Research Organisation/Marine National Facility) during seven linked voyages in austral autumn, winter and spring 2012 and 2013 (Supplement, Table S1). Figure 1 shows the locations of the ship measurements. In 2012 the voyage started in Hobart (April), after which the ship went northeast to Brisbane (Trip 1, May) then turned towards Fiji (Trip 2, May) and returned to Hobart (Trip 3, June). The 2013 trip also started from Hobart (June), after which the ship turned west towards Perth (Trip 4, June) and proceeded clockwise to Broome (Trip 5, July) and along northern Australia (August) then south to Brisbane (Trip 6, September) and back to Hobart (Trip 7, October). For the analysis we separated the data into northbound (NB) and southbound (SB) sections for both years (Figure 1).

The measurements and data analysis are described in detail in a forthcoming paper in Earth System Science Data (Kubistin et al.) and are briefly summarised here. The data will be available in Pangaea. All trace gas mole fractions were measured with a Fourier Transform Infrared (FTIR) trace gas analyser which was an early version of that described by Griffith et al. (2012) (see also Esler et al. (2000)). The analyser is based around a Bruker IRCube FTIR spectrometer coupled to a 22m multipass White cell containing the sampled air. Trace gas amounts are retrieved from the collected spectra by least squares fitting of calculated spectra to the measured spectra in four spectral regions between 2000 and 3800 cm<sup>-1</sup> (Griffith, 1996; Griffith et al., 2012). Sampled air from the foremast of the ship flowed at 1 Lmin<sup>-1</sup> through the measurement cell. Single 1 s spectra were measured continuously and averaged over 5 min for the 2012 and 3 min for the 2013 voyage. The analyser was calibrated before and after the voyages against a suite of standard reference gases provided by CSIRO with assigned mole fractions on the relevant World Meteorological Organization - Global Atmosphere Watch (WMO-GAW) scales - WMO X2007 scale for CO<sub>2</sub>, X2004A

**Table 1.** GEOS-Chem emission inventories and chemical fields used for the three carbon gas simulations. Years represent periods when time-specific inventories were available during our simulation time period (2005-2014).

| Source and sink fields                     | CO <sub>2</sub>               | Years     | CH <sub>4</sub>              | Years     | CO                            | Years     |
|--------------------------------------------|-------------------------------|-----------|------------------------------|-----------|-------------------------------|-----------|
| Fossil fuel <sup>a</sup>                   | ODIAC <sup>b</sup>            | 2005-2014 | EDGARv4.2 <sup>c</sup>       | 2005-2008 | EDGARv4.2 <sup>c</sup>        | 2005-2008 |
| <i>Europe</i>                              | -                             | -         | -                            | -         | EMEP <sup>d</sup>             | 2005-2012 |
| <i>Mexico</i>                              | -                             | -         | -                            | -         | BRAVO <sup>e</sup>            | 1999      |
| <i>Canada</i>                              | -                             | -         | -                            | -         | CAC <sup>f</sup>              | 2005-2008 |
| <i>USA</i>                                 | -                             | -         | -                            | -         | NEI <sup>g</sup>              | 2006-2013 |
| <i>Asia</i>                                | -                             | -         | -                            | -         | MIX v1.1 <sup>h</sup>         | 2008-2010 |
| Biomass Burning                            | QFEDv2 <sup>i</sup>           | 2005-2014 | QFEDv2 <sup>i</sup>          | 2005-2014 | QFEDv2 <sup>i</sup>           | 2005-2014 |
| Biofuel Burning                            | Yevich and Logan <sup>j</sup> | 1995      | -                            | -         | Yevich and Logan <sup>j</sup> | 1995      |
| Ocean Exchange                             | Takahashi et al. <sup>k</sup> | 2000-2013 | -                            | -         | -                             | -         |
| Balanced Biosphere                         | SIB3 <sup>l</sup>             | 2005-2010 | -                            | -         | -                             | -         |
| Net Terrestrial Exchange                   | TransCom <sup>m</sup>         | 2000      | -                            | -         | -                             | -         |
| Shipping                                   | ICOADS <sup>n</sup>           | 2004      | -                            | -         | ICOADS <sup>n</sup>           | 2002      |
| Aviation                                   | AEIC <sup>o</sup>             | 2005      | -                            | -         | AEIC <sup>o</sup>             | 2005      |
| Soil and Termites                          | -                             | -         | Fung et al. <sup>p</sup>     | 1985      | -                             | -         |
| Wetland                                    | -                             | -         | WetCHARTs v1.0 <sup>q</sup>  | 2005-2014 | -                             | -         |
| Rice                                       | -                             | -         | EDGARv4.3.2 <sup>c</sup>     | 2009      | -                             | -         |
| $P(\text{CO})_{\text{CH}_4}$ <sup>r</sup>  | -                             | -         | -                            | -         | Archived fields <sup>s</sup>  | 2009-2011 |
| $P(\text{CO})_{\text{NMVOC}}$ <sup>r</sup> | -                             | -         | -                            | -         | Archived fields <sup>s</sup>  | 2009-2011 |
| OH sink                                    | -                             | -         | Archived fields <sup>t</sup> | 1985      | Archived fields <sup>s</sup>  | 2009-2011 |

<sup>a</sup>The anthropogenic emissions in the CO simulation had regional overwrites for the countries specified in the table.

<sup>b</sup>Open-source Data Inventory of Anthropogenic CO<sub>2</sub> (Oda and Maksyutov, 2011)

<sup>c</sup>European Commission. Emission Database for Global Atmospheric Research (<http://edgar.jrc.ec.europa.eu/>)

<sup>d</sup>European Monitoring and Evaluation Programme (Vestreng et al., 2007)

<sup>e</sup>The Big Bend Regional Aerosol and Visibility Observational Study (Kuhns et al., 2005)

<sup>f</sup>Criteria Air Contaminants Van Donkelaar et al. (2012)

<sup>g</sup>National Emissions Inventory (<http://www.epa.gov/ttnchie1/net/2005inventory.html>)

<sup>h</sup>Li et al. (2017)

<sup>i</sup>The Quick Fire Emissions Dataset (Darmenov and da Silva, 2015)

<sup>j</sup>Yevich and Logan (2003)

<sup>k</sup>Takahashi et al. (2009)

<sup>l</sup>The Simple Biosphere (Messerschmidt et al., 2012)

<sup>m</sup>Baker et al. (2006)

<sup>n</sup>International Comprehensive Ocean–Atmosphere Data Set (Lee et al., 2011)

<sup>o</sup>Aviation Emissions Inventory Code (Stettler et al., 2011)

<sup>p</sup>Fung et al. (1991)

<sup>q</sup>Bloom et al. (2017)

<sup>r</sup>The production of CO from NMVOCs and CH<sub>4</sub> is calculated with the GEOS-Chem full chemistry simulation from simulated monthly CO chemical production rates using biogenic NMVOC emissions from the Model of Emissions of Gases and Aerosols from Nature (MEGAN) (Guenther et al., 2012), anthropogenic NMVOC emissions from the Reanalysis of the Tropospheric chemical composition (RETRO) inventory (Bolscher et al., 2007) and biomass burning NMVOC emissions from GFEDv3 (Fisher et al., 2017).

<sup>s</sup>Fisher et al. (2017)

<sup>t</sup>Park et al. (2004)



**Table 2.** FTIR analyser 5 min repeatability and accuracy for CO<sub>2</sub>, CH<sub>4</sub> and CO.

| Species               | Repeatability | Accuracy |
|-----------------------|---------------|----------|
| CO <sub>2</sub> (ppm) | 0.06          | 0.15     |
| CH <sub>4</sub> (ppb) | 0.6           | 0.7      |
| CO (ppb)              | 0.7           | 0.7      |

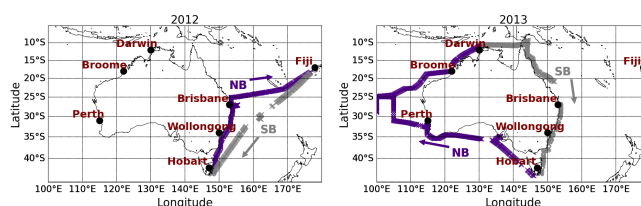

**Figure 1.** Locations of the shipborne measurements (purple/grey) and other sites relevant for the data interpretation (red). The ship track is separated into northbound (NB - purple, 147.5-176.6°E in 2012 and 146.1-130.9°E in 2013) and southbound (SB - grey, 176.6-146.1°E in 2012 and 130.9-147.5°E in 2013) sections to ease the interpretation of the data.

for CH<sub>4</sub> and X2014 for CO. During the voyages the calibration was checked against a single calibrated working standard tank and adjusted as required.

Precision and accuracy were determined from 5 min Allan Variance and 1 sigma reproducibility of the target tank measurements respectively. Table 2 summarises the 5 min repeatability and accuracy for each species.

### 5 3 Model description

To investigate the sources and sinks driving the measured carbon greenhouse gases, we used the GEOS-Chem 3D global chemical transport model (Bey et al., 2001). The meteorological inputs for GEOS-Chem come from the Modern-Era Retrospective analysis for Research and Applications, Version 2 (MERRA2) reanalysis developed by the NASA Global Modelling and Assimilation Office (GMAO). We use the offline CO<sub>2</sub>, CH<sub>4</sub> and CO simulations from GEOS-Chem v11-01. The CO<sub>2</sub> simulation is based on Nassar et al. (2010) and Nassar et al. (2013), the CH<sub>4</sub> simulation is based on Wecht et al. (2014), and the CO simulation is described by Fisher et al. (2017).

We ran the model at 2°x2.5° horizontal resolution with 47 vertical levels from 2005 through 2016 to correct biases in the trends of the CO<sub>2</sub> and CH<sub>4</sub> simulation (Figure S1, Supplement), and 2012-2013 for all results presented here. The simulations were initialized with a 10-year spinup for CO<sub>2</sub> and CH<sub>4</sub> using 2005 as a base spinup year and a 6-month spinup for CO using 2005. We have found these spinup periods to be sufficient to establish consistent spatial gradients in the atmosphere of all the tracers and total amount of each gas. The emission inventories and chemical fields used by each simulation are shown in

Table 1. Where possible, we used common emission inventories for all three simulations. The three carbon gas simulations are decoupled, hence the chemical production and loss of each species (e.g., CO<sub>2</sub> production from the oxidation of CO, CH<sub>4</sub> and NMVOCs) were computed offline using archived production rates and OH concentrations. For simulations that were outside of the specified inventory time range, the model re-used the data from the closest year.

5 The lack of time-specific emission inventories for some emission types can introduce uncertainties in the results, but we expect these errors to be low in our simulations. CO interannual variability is mostly driven by meteorology and biomass burning, for which we used time-specific emission inventories (Fisher et al., 2017). We use time-specific emissions for CO<sub>2</sub> from fossil fuels, and other anthropogenic CO<sub>2</sub> emissions outside the time range (ships, aviation, biofuel), have been shown to have a small contribution to both total CO<sub>2</sub> and CO<sub>2</sub> variability relative to the other sources (Nassar et al., 2010). While  
10 the terrestrial biospheric fluxes are based on climatological data, these fluxes have a larger effect in the northern hemisphere than the southern hemisphere due to the greater landmass and for periods with El Niño and La Niña events (Heimann and Reichstein, 2008). All of our measurements (Apr-June 2012, June-Oct 2013) were collected during weak El Niño and La Niña periods. For CH<sub>4</sub> wetlands and biomass burning are the main drivers of interannual variability (Bousquet et al., 2006), and we used time-specific emissions for both source types.

15 The carbon gas simulations are all linear, and for each we included a suite of tracers tagged by source type (and, for CO, region). The tagged CO<sub>2</sub> simulation includes 8 tracers to distinguish between source types: fossil fuel, ocean exchange, biomass burning, biofuel, balanced biosphere, net annual terrestrial exchange, shipping and aviation. The ocean exchange, balanced biosphere, and net annual terrestrial exchange act both as a sink and source, while the other tracers represent only sources of CO<sub>2</sub>.

20 The CH<sub>4</sub> tagged simulation includes 11 tracers for different source types: gas and oil, coal, livestock, waste, biofuel, rice cultivation, biomass burning, wetlands, termites, soil absorption and other combined anthropogenic emissions (e.g., energy manufacturing transformation, non-road transportation, road transportation, industrial process and product use, and fossil fuel fires). The soil absorption represents a sink of CH<sub>4</sub> while all other tracers are sources. For CH<sub>4</sub>, an OH sink is applied to all of the tracers; however, in contrast to the soil absorption sink there is no separate tracer for this loss.

25 The CO tagged simulation includes 4 source types: anthropogenic, biomass burning, and separate CH<sub>4</sub> oxidation and NMVOC oxidation. The anthropogenic tracer includes both fossil fuel and biofuel since these sources are combined in some of the emission inventories. Stratospheric and tropospheric OH sinks are applied to all of the CO tracers. We further distinguished the anthropogenic and biomass burning tracers by region to aid in interpretation of transported influences. The transported amounts of the anthropogenic and biomass burning sources hereinafter refer to emissions from the non-Australian  
30 tagged regions as shown in Figure 2.

For comparison to the ship measurements, model outputs were saved for grid boxes corresponding to the measured time, latitude and longitude along the ship track at the model surface level. Both the measurements and modelled output were averaged to the model temporal (20 min) and spatial (2°x2.5°) resolution to calculate one average value for each unique grid box-timestep combination. Hereinafter we will refer to this averaging method as the measurement-model averaging.

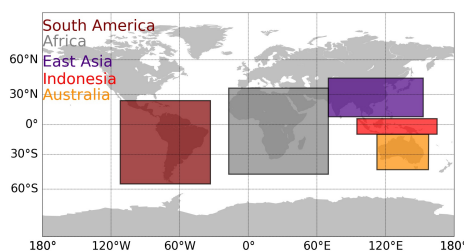

**Figure 2.** GEOS-Chem tagged regions used for anthropogenic and biomass burning sources in the CO simulation. South America (112°W - 33°W, 56°S - 24°N), Africa (17°W - 70°E, 48°S - 36°N), East Asia (8°N - 45°N, 70°E - 153°E), Indonesia (10°S - 6°N, 95°E - 165°E), Australia (44°S - 10°S, 112.5°E - 157.7°E). The East Asia and Indonesia regions were used for the biomass burning source only. Regions not shown on the map are Anthropogenic Other and Biomass Burning Other, these are regional tags that cover everything except the source specific tagged regions.

The model initial conditions and the imbalance between the modelled sources and sinks relative to their true values created a bias in the model, which led to a difference between the modelled and measured growth rates. To compare our surface CO<sub>2</sub> and CH<sub>4</sub> measurements with the model, we corrected the modelled growth rates by first assessing offsets between the modelled and measured surface values at background stations (Barrow, Trinidad, Mauna Loa, American Samoa, Cape Grim and South Pole) (Dlugokencky et al., 2018b, a) as shown in Figure S1 in the Supplement. The modelled offset was then corrected with a globally-averaged 13-point running mean of the difference between the modelled and measured data at the background sites. We applied this linear correction method for CO<sub>2</sub> and CH<sub>4</sub>. CO was not affected by this bias due to its shorter lifetime and lack of long term trend.

#### 4 Observed and modelled CO<sub>2</sub>, CH<sub>4</sub> and CO distribution around Australia

Figure 3 shows the measured and modelled CO<sub>2</sub>, CH<sub>4</sub> and CO, and the difference between measurements and model, in 2012 and 2013. In both years, the three gases show similar spatial distributions, indicating their likely co-emission.

In 2012 we observed high concentrations with repeated co-enhancements of all three gases and co-enhancements of only CO<sub>2</sub> and CO along the east coast (NB part). These are all near urban and industrial areas, indicating the anthropogenic influence at these hotspots. Enhancements are also observed away from the coast on the SB part near Fiji (21°S), around 38°S, 153°E on the way from Fiji to Hobart, and around 41°S, 150°E off the north-east coast of Tasmania. Relative to the 2012 measurements, the 2013 enhancements were dominated by co-enhancements of only two gases, CH<sub>4</sub> and CO, and with more pronounced individual enhancements. No significant enhancements were observed along the south and west coasts (2013 NB, 45°S to 25°S); however, there is a gradual increase of all three gases towards the tropics. In the northern tropical region we observe enhancements and a rise of all three gases between 12° and 20°S (2013 NB). This is likely to arise from biomass

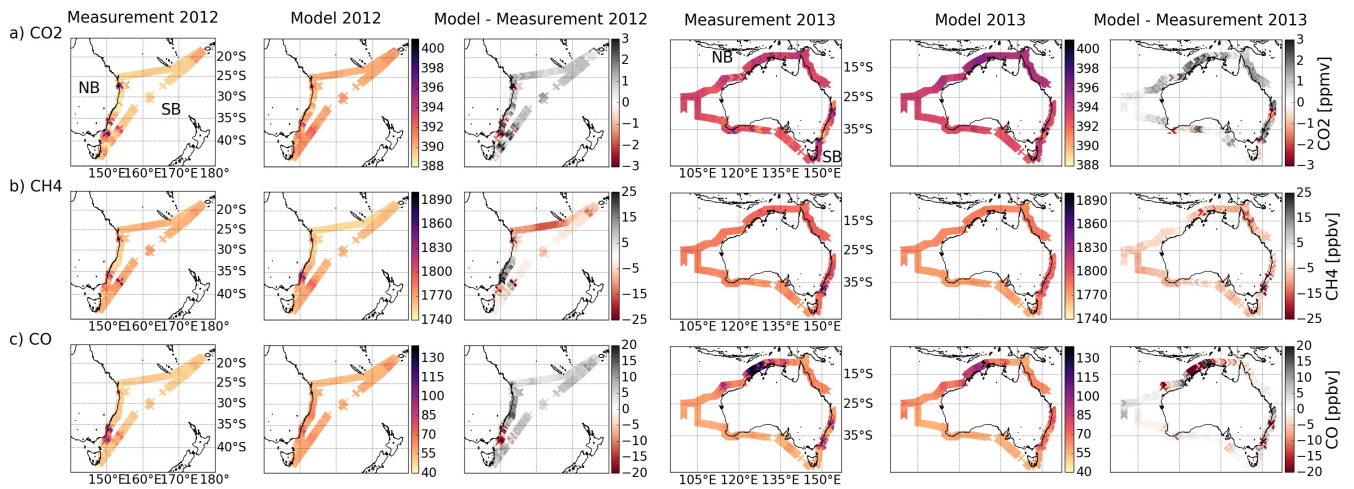

**Figure 3.** Measured and modelled CO<sub>2</sub> (a) CH<sub>4</sub> (b) and CO (c) concentrations from the ship cruises in 2012 (left) and 2013 (right). The model-measurement difference is also shown for each gas and ship cruise.

burning that occurs during the late dry season (August-September), which is characterised by frequent wildfires (Edwards et al., 2006a).

The ship track was the same along the east coast in both years; however, most of the enhancements observed in that region differed. These results suggest that the different time period of the measurement collection (April/May 2012 compared to September 2013) and transport patterns could have affected the difference in the spatial distribution of these gases. Reanalysis data from MERRA2 meteorology show weak easterly winds along the east coast (30 - 34°S) during the 2012 cruise compared to stronger westerly winds during the 2013 cruise (Supplement, Figure S2). The stronger 2013 winds may explain the more well-mixed nature of the enhancements relative to the more distinct enhancements observed in 2012.

To understand the drivers of the observed enhancements and the difference between the modelled and measured enhancements, we use modelled tracers from the GEOS-Chem model (Sect. 3). Figure 4 shows the latitudinal enhancement of the measured (black) and modelled (red) concentrations, with different modelled tracers (stacked bars) that represent sources and sinks averaged for every 2° latitude after the measurement-model averaging. The latitudinal enhancements were calculated based on the difference between the individual 2° latitudinal values and the minimum value of each gas during the section in question (e.g., 2012 NB). With this calculation the contribution of each gas and tracer is treated independently between sections since the change of the gas is calculated relative to the section in question only. If not stated otherwise, the enhancements refer to these latitudinal enhancements that include both the broad scale change of each gas with latitude and the enhancements due to different local or regional sources.

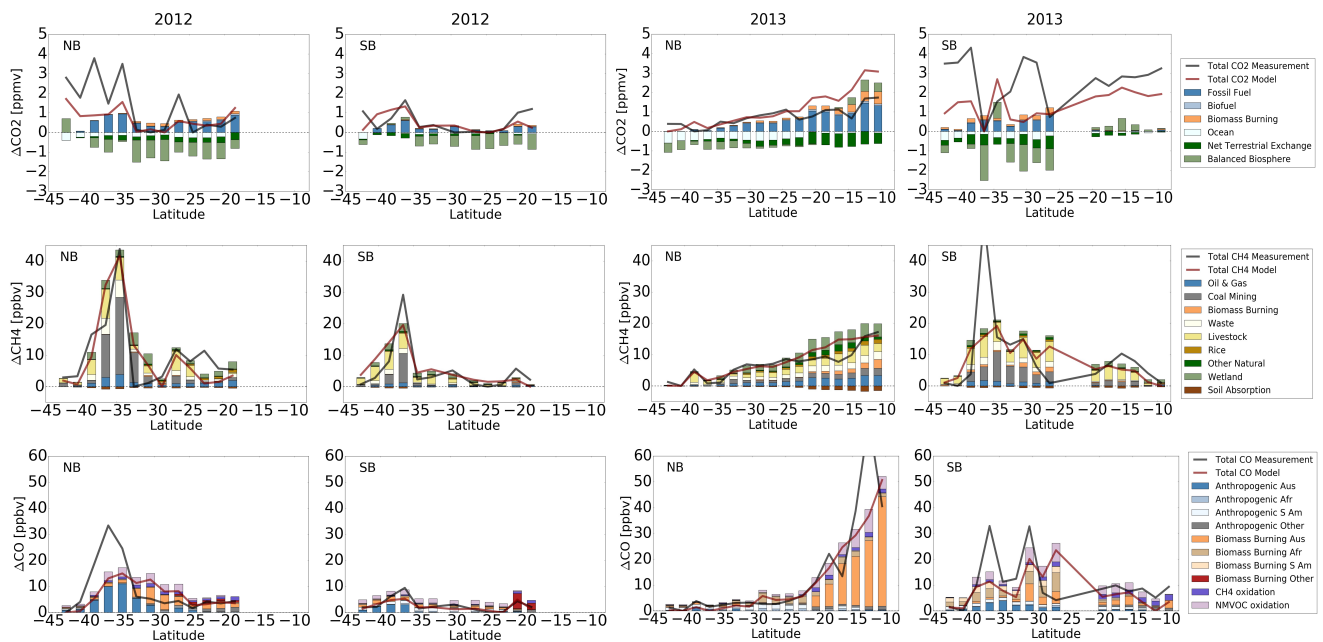

**Figure 4.** Measured (black) and modelled (red)  $\text{CO}_2$ ,  $\text{CH}_4$  and  $\text{CO}$  latitudinal enhancements (lines) and modelled source contributions (stacked bars) in 2012 (left) and 2013 (right) for the Northbound (NB) and Southbound (SB) sections of the ship cruises. All the data were averaged in  $2^\circ$  latitude bands after the measurement-model averaging. The enhancements were calculated based on the difference between the individual  $2^\circ$  latitudinal values and the minimum value during each section.

#### 4.1 Anthropogenic sources

The model reproduced the observed east coast enhancements in 2012 (Figure 3) and primarily attributes them to anthropogenic sources, including fossil fuel for  $\text{CO}_2$ , coal, livestock, oil, gas and waste for  $\text{CH}_4$ , and fossil and biofuel for  $\text{CO}$  (25 - 44°S, Figure 4). A previous study by Buchholz et al. (2016) also showed that anthropogenic sources have a strong impact on measurements collected on the east coast. The wind patterns and the modelled sources show that the high concentrations observed at 38°S, 153°E, downwind from the southeast Australian coast, are transported anthropogenic sources for all three gases. The model tracers show the same source influences in this downwind region as those observed nearer to the east coast; however, the model underestimates the strength of the transported enhancements due to either underestimated emissions or the influence of numerical diffusion on transport. The SB voyage occurred several weeks after the NB voyage up the east coast, so enhancements with similar source profiles do not necessarily indicate the same enhancement events. For  $\text{CH}_4$ , the transported amounts observed in the downwind region were higher than those observed along the coast during the NB leg (Figure 3), indicating that even if these enhancements derive from the same urban source, the source was stronger during the later (SB) trip than during the earlier (NB) trip. The high measured concentrations near Fiji arise from a combination of transported biomass burning and

anthropogenic sources while the enhancements at 41°S, 150°E are due to transport from the northeast coast of Tasmania. The main source driving the observed CH<sub>4</sub> enhancement along the Tasmanian coast is emission from livestock, in contrast to the strong coal burning emissions observed along the southeast mainland coast.

The measurements along the northwest and northern coasts were taken in July/August (NB 2013), when the ITCZ is situated to the north of Australia (Supplement, Figure S3), and Australia is chemically isolated from the northern hemisphere; however, for long-lived gases like CO<sub>2</sub> and CH<sub>4</sub>, we expect interhemispheric transport to induce a latitudinal gradient throughout the year. We attribute a significant part of the CO<sub>2</sub> fossil fuel and anthropogenic CH<sub>4</sub> sources in the northern parts of Australia to transport from the northern hemisphere due to their gradual increase and diffuse enhancements. Based on the regionally tagged CO tracers, the largest contribution to the anthropogenic sources in the northern parts is attributed to transport from Asia, Indonesia and elsewhere in the northern hemisphere (Figure 4, NB section, 2013).

## 4.2 Natural sources

Southern hemisphere biomass burning is more pronounced in September (2013 SB) than April/May (2012 NB) and the model shows a larger influence from both local and transported biomass burning for all three gases along the east coast in 2013 than in 2012.

The model captured the rise of all three gases in the tropical regions, but did not fully reproduce the strength of the enhancements. For all three gases it underestimated the source from biomass burning, except for an overestimated CO enhancement around 12°S. These biases suggest that, despite using the year-specific biomass burning emissions from the QFED inventory, there are still uncertainties in biomass burning emissions that affect simulation of carbon gases. Based on the modelled CO tracers (Figure 4), the biomass burning enhancements along the north coast (NB, SB 2013; 10 - 25°S) mainly originated from Australia. Transported biomass burning from Africa was present along the the west coast (NB 2013; 25 - 35°S), while the east coast (SB 2013; 25 - 45°S) was affected by biomass burning from both Africa and South America.

To further examine the transport from fires we used data from the MODIS (Moderate Resolution Imaging Spectroradiometer) instrument and global winds from the MERRA2 reanalysis. Figure S4 (Supplement) shows the total fire pixels from MODIS detected between three weeks and one week prior to each of the seven ship cruises segments in 2012 and 2013, along with monthly mean wind fields. The figure suggests that South American fires prior to the 2013 SB transit along the east coast (September 2013) were stronger than before the 2013 NB transit along the west coast (July 2013). This explains the greater South American biomass burning influence along the east coast relative to the west coast, observed by the model using QFED biomass burning emissions, that are based on products from MODIS. Strong fires were also observed in Africa prior to both the NB and SB transits in 2013. However, the fires before the SB transit were more spread out along the east and south areas of Africa, and more coincident with the westerly winds, relative to the fires observed during the NB transit. This resulted in more biomass burning emissions transport to the Australian east coast during September and less to the west coast in July.

### 4.3 Latitudinal gradients and background regions

The model indicates that for CO<sub>2</sub> the increase along the south and west coasts is driven by fossil fuel emissions, biomass burning, changes in the biosphere and also a decrease of the ocean sink, which together result in higher CO<sub>2</sub> in the northern parts of Australia. For CO, the latitudinal increase is mainly due to increased biomass burning and NMVOC oxidation, while for CH<sub>4</sub>, both anthropogenic and natural sources showed a gradual increase with latitude.

Based on the measurements along the southwest, west and northwest coasts (where few enhancements were observed), we observe a background latitudinal gradient with a standard error of  $0.019 \pm 0.003$  ppm deg<sup>-1</sup> for CO<sub>2</sub>,  $0.34 \pm 0.02$  ppb deg<sup>-1</sup> for CH<sub>4</sub> and  $0.82 \pm 0.05$  ppb deg<sup>-1</sup> for CO. The model showed a stronger latitudinal gradient of  $0.098 \pm 0.005$  ppm deg<sup>-1</sup> for CO<sub>2</sub>,  $0.61 \pm 0.02$  ppb deg<sup>-1</sup> for CH<sub>4</sub> and  $1.09 \pm 0.07$  ppb deg<sup>-1</sup> for CO. The difference between the measured and modelled latitudinal gradients was due to either the imbalance of the different sources and sinks used in the model (e.g., weaker southern hemisphere sources in the model) or inaccurate transport (e.g., weaker latitudinal transport).

For both years, we identified sections where no enhancements were observed and used these to quantify background amounts for the gases. During 2012, all three gases were the least variable during the NB section from Brisbane to Fiji in the Coral Sea and on the SB section between 155° and 173°E in the Tasman Sea. During 2013 no enhancements were observed sailing west in the NB section over the Indian Ocean. The locations of these regions are shown in Figure 5 (top panel). The background section mean mole fractions of the gases, both measured and modelled, are shown in Figure 5 and in Table S2 (Supplement). The measurements in the three regions are consistent with the expected temporal and latitudinal variations of these gases. The amounts of all three gases were higher in the Indian Ocean than in the two other regions, due to the interannual and seasonal variability between the periods when the measurements were collected (July 2013 compared to May-June 2012). CH<sub>4</sub> and CO were higher in the Tasman Sea (June 2012) relative to the Coral Sea (May 2012), presumably due to the one-month difference in the measurement timing. CO<sub>2</sub> showed minimal difference between the Tasman Sea and Coral Sea background regions, but with lower values in the Tasman Sea, presumably due to the weaker oceanic sink closer to the tropics (Takahashi et al., 2009). The model overestimated the background values for CO<sub>2</sub> and CO and underestimated the background CH<sub>4</sub> in all three regions. The model-measurement residuals were consistent for each gas in all three background regions showing that the sources or sinks acting on a broader scale need further constraints.

### 5 Source variability with respect to scale

To assess how much each source and sink contribution varied at short (local) versus long (regional) scales along the four measurement sections (NB and SB, 2012 and 2013), we separated the total amount of each gas into background values (Figure 6a) and enhancements (Figure 6b). The bottom plots in Figures 6a and 6b represent the percentage change of each model tracer relative to the tracers during a given measurement section, while the top plots represent the absolute change in a given tracer relative to the first measurement section (2012 NB). All the contributions are calculated along the ship track, hence results discussed here refer to CO<sub>2</sub>, CH<sub>4</sub> and CO in the Australian region only.

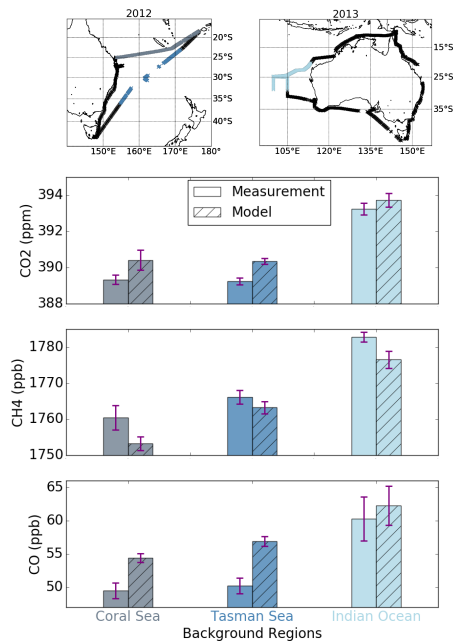

**Figure 5.** Measured and modelled CO<sub>2</sub>, CH<sub>4</sub> and CO concentrations from the ship cruises in different background regions with one standard deviation. The location of the sections where background values were observed are shown on the map. The measurements in the Coral Sea (gray) were collected during May 2012, in the Tasman Sea (dark blue) during June 2012 and in the Indian Ocean (light blue) during July 2013.

Figure S5 (Supplement) illustrates the process of separating the measured and modelled data into background values and enhancements. We first averaged the data into 0.1° latitudinal values (after the measurement-model averaging described in Section 3), and for each section we calculated the change of all three gases from one latitude bin to another. Based on these changes (e.g.  $\delta\text{CO}$ , Figure S5, Supplement) we examined different values to choose a threshold value that most clearly separates the background regions from the enhancements for each section separately. For changes below the threshold value, the measured and modelled points were classified as background regions, and enhancements if the change between the points was above the threshold value. The threshold values for each section can be found in Table S3 (Supplement). The background values were additionally filtered to only include data within one standard deviation of the mean. Due to the influence of the latitudinal gradient on the background values, we used a moving mean and standard deviation. Finally, we calculated the relative values of the enhancements based on the difference between the amount of gas at each individual 0.1° latitudinal value and the minimum value during the specified sections, as in Section 4. Table S4 (Supplement) provides a statistical comparison of the measured and modelled total, background-only and enhancement-only values.

The source and sink contributions to the background (Figure 6a) values showed the same behaviour as the source and sink contributions to the total amounts (Figure S6 and Table S5, Supplement), but with less variability. Only the CO local sources



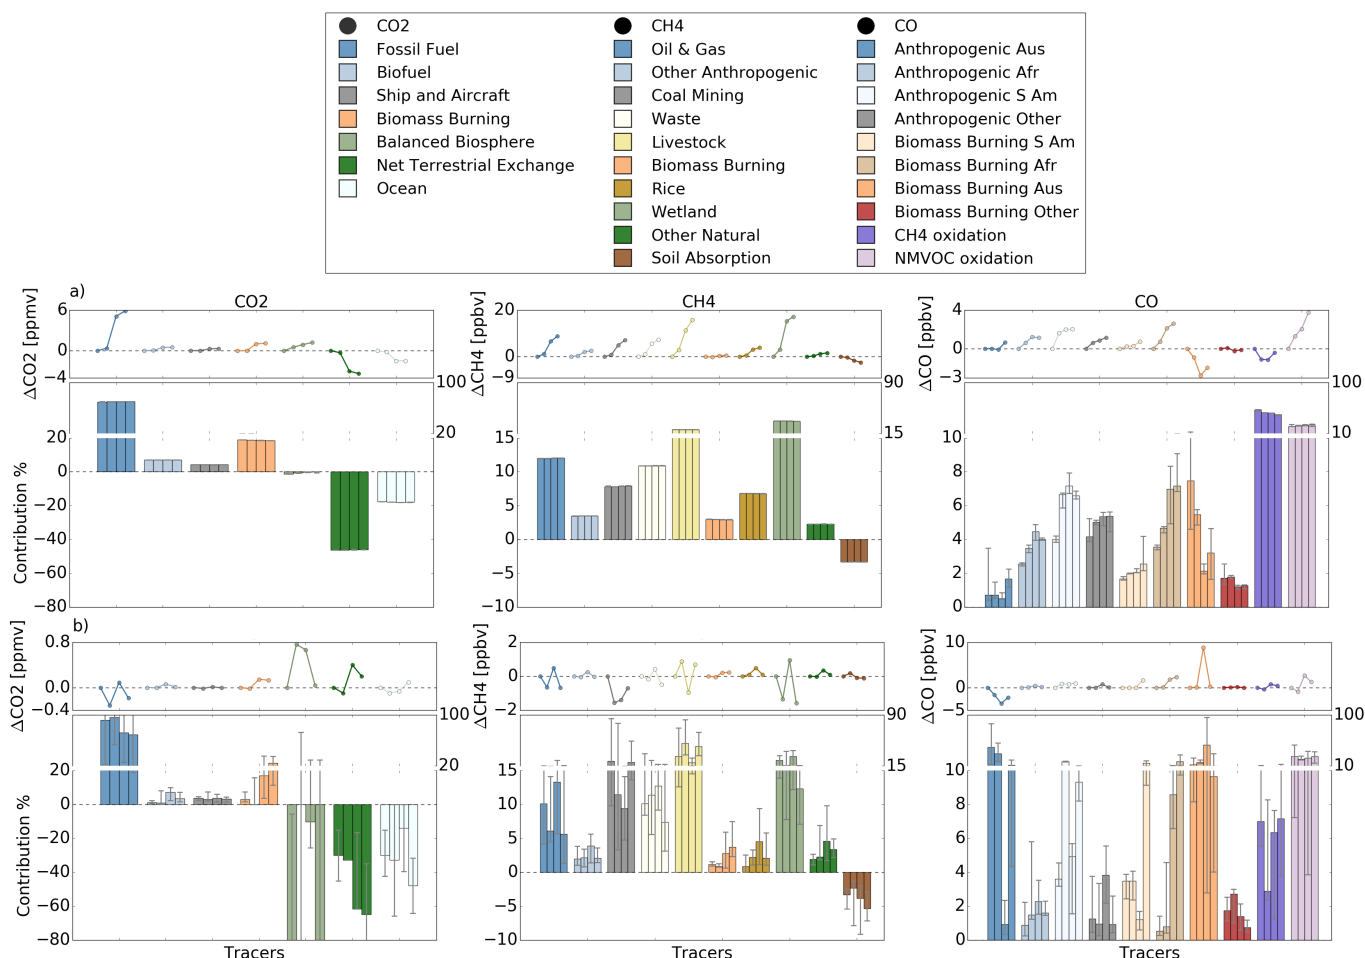

**Figure 6.**  $\text{CO}_2$ ,  $\text{CH}_4$  and  $\text{CO}$  tracer contribution across the 4 measurement section in 2012 and 2013 (2012 NB, 2012 2B, 2013 NB, 2013 SB, from left to right) for the background (a) and enhancements (b). We separated out the total amount of each gas into background values and enhancements to examine the impact of different temporal and spatial scales on the change of the sources. The bottom plots show the contribution of each tracer during a specific trip while top plots show the change of each tracer across the four sections relative to the first section (2012 NB). The contributions are calculated based on the median for each section and the uncertainties represent the 25th (lower error bar) and 75th (upper error bar) percentile.

(Australian anthropogenic and biomass burning emissions) and African biomass burning showed any difference between background and total amounts. As a result, only the background values are discussed here, but the background analysis also applies to the total amount of each gas.

Our model results suggest that fossil fuels followed by biomass burning contribute the most to background and total  $\text{CO}_2$  (Figure 6a). Both the biosphere and the ocean were net sinks during all four measurement sections, with a net contribution

( $-64 \pm 0.1\%$ , averaged along the four sections with one standard deviation) about 6% less than the amount of  $\text{CO}_2$  emitted from fossil fuels alone ( $69.9 \pm 0.2\%$ ).

For  $\text{CH}_4$ , wetlands were identified as the biggest background source followed by emissions from livestock, oil, gas and waste. Emissions from coal mining and rice were smaller, but still important. The remaining sources contributed less than 3% each. The  $\text{CH}_4$  soil absorption tracer represents a sink that is similar in magnitude to the  $\text{CH}_4$  source from biomass burning, as seen previously by Dalal et al. (2008) for Australia, and their quantification of the contribution of different anthropogenic sources is consistent with our findings here.

For CO, chemical production from  $\text{CH}_4$  and NMVOCs were the biggest contributors to the background and total amounts ( $70 \pm 2\%$ ). This shows that the CO burden in Australia and the southern hemisphere is largely controlled by secondary CO production, consistent with findings from Zeng et al. (2015) that biogenic emissions provide the largest CO background contribution. Biomass burning, both transported and from Australia, is responsible for  $14 \pm 1\%$  of the total simulated CO, from which  $68 \pm 12\%$  is attributed to transported biomass burning, with the highest amounts originating from Africa, followed by South America, as seen previously by Gloudemans et al. (2006) and Ridder et al. (2012). Anthropogenic processes contribute  $16 \pm 2\%$  to the total CO,  $90 \pm 6\%$  of which is transported (mainly from South America).

In the model, the  $\text{CO}_2$  and  $\text{CH}_4$  enhancements (Figure 6b) were generally driven by similar sources to the background amounts (Figure 6a). For  $\text{CO}_2$ , the biospheric influence is more pronounced in the enhancements than in the background. For  $\text{CH}_4$ , anthropogenic sources (especially coal mining) contribute more to the enhancements than to the background, while wetlands (the biggest contribution to the  $\text{CH}_4$  background) contributes considerably less to the enhancements. Fraser et al. (2011) showed that for years prior to 2012 at a single site on the east coast (Wollongong), coal mining was the largest source of  $\text{CH}_4$  enhancements above background (60%). Our results suggest that coal mining (21%) and emissions from livestock (28%) are the largest contributors to the enhancements along the east coast in 2012 (leftmost gray bar in Figure 6b). Although, the different analysis time periods might have influenced these differences, the main reason for the lower coal mining contribution in our results is due to the wider measurement region along the east coast used to quantify these contributions.

The CO enhancements were less affected by the tracers that contributed the most to the background, since these tend to be spatially uniform sources. While total and background CO amounts were dominated by secondary sources ( $\text{CH}_4$  and NMVOC oxidation), the enhancements were largely driven by primary CO emissions from biomass burning and anthropogenic sources, with stronger influence from Australian sources than from long-range transport. The CO enhancements also showed significant regional variability.

For all three gases, the enhancements above the background were dominated by temporally and spatially variable sources and sinks, displaying significant variability both within each section and between the four sections. In contrast, the  $\text{CO}_2$  and  $\text{CH}_4$  sources and sinks contributing to the background showed minimal variability between the four measurement sections. The CO background sources varied somewhat between the four sections (Figure 6a), due to the shorter CO lifetime, but this background variability was still less than the variability seen in the CO enhancements (Figure 6b).

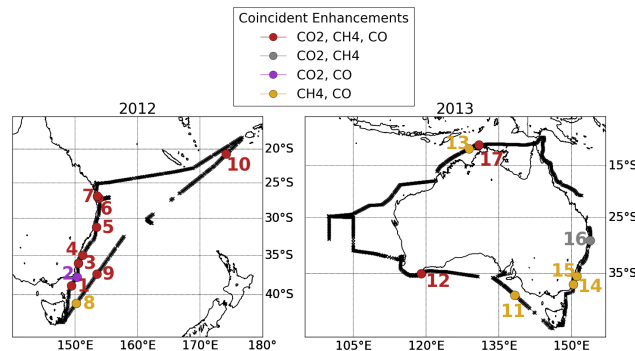

**Figure 7.** Location of the 17 events during which we observed co-enhancements of CO<sub>2</sub>, CH<sub>4</sub> and CO. The red numbers represent events with coincident enhancements in all three species, grey numbers represent co-enhancements in CO<sub>2</sub> and CH<sub>4</sub> only, purple numbers represent coincident enhancements in CO<sub>2</sub> and CO only, and yellow numbers represent coincident enhancements from CH<sub>4</sub> and CO only. The black line represents the measurement track during 2012 and 2013.

## 6 CO<sub>2</sub>, CH<sub>4</sub> and CO correlations and co-enhancements

The spatial distributions of the three carbon gases (Figure 3) showed similar enhancement patterns, suggesting that the gases were co-emitted. From these coincident and co-located enhancements, we estimated enhancement ratios (ERs) from both the measured and modelled values, averaged into 0.1° latitudinal bands, across the 4 different sections after the measurement-model averaging. We defined the ER between two species as the slope between the enhancements of the two species calculated using linear regression (Turnbull et al., 2011). For the purposes of calculating the ER, the enhancement was defined as the difference between the maximum and minimum value of each gas during the specific co-enhancement event. This definition removes the potential impact introduced by the changing background concentrations between the three gases. Unlike the enhancements discussed earlier, the enhancements used to define the ERs are not affected by latitudinal gradients, and they are not influenced by the changes due to latitudinal or other broad-scale changes.

We use this information to evaluate mismatches between the model and the observations and specifically to determine whether (1) the modelled source profile is correct (i.e., same ERs as in the observations) but with the wrong magnitude for the source or (2) the model has a missing or incorrect source (different ERs). Figures S7 and S8 (Supplement) show species-species linear regressions for events when we observe coincident enhancements in at least two gases.

From the measurements, we found evidence of co-enhancements during 17 events. The locations of these events are shown in Figure 7. The ERs and correlation coefficients are also summarized in Table S6 (Supplement). All events except event 3, 4, 12 and 17 showed correlations of  $r > 0.80$  between the species during the coincident enhancements. The 2012 measurements generally showed co-enhancements of all three gases while the 2013 data generally showed individual enhancement or enhancements of only two species. Of the 17 events identified in the measurements, the model reproduced co-enhancements for 14 (all except 2, 14, and the CH<sub>4</sub> enhancement in 10) but underestimated the magnitude of most enhancements.

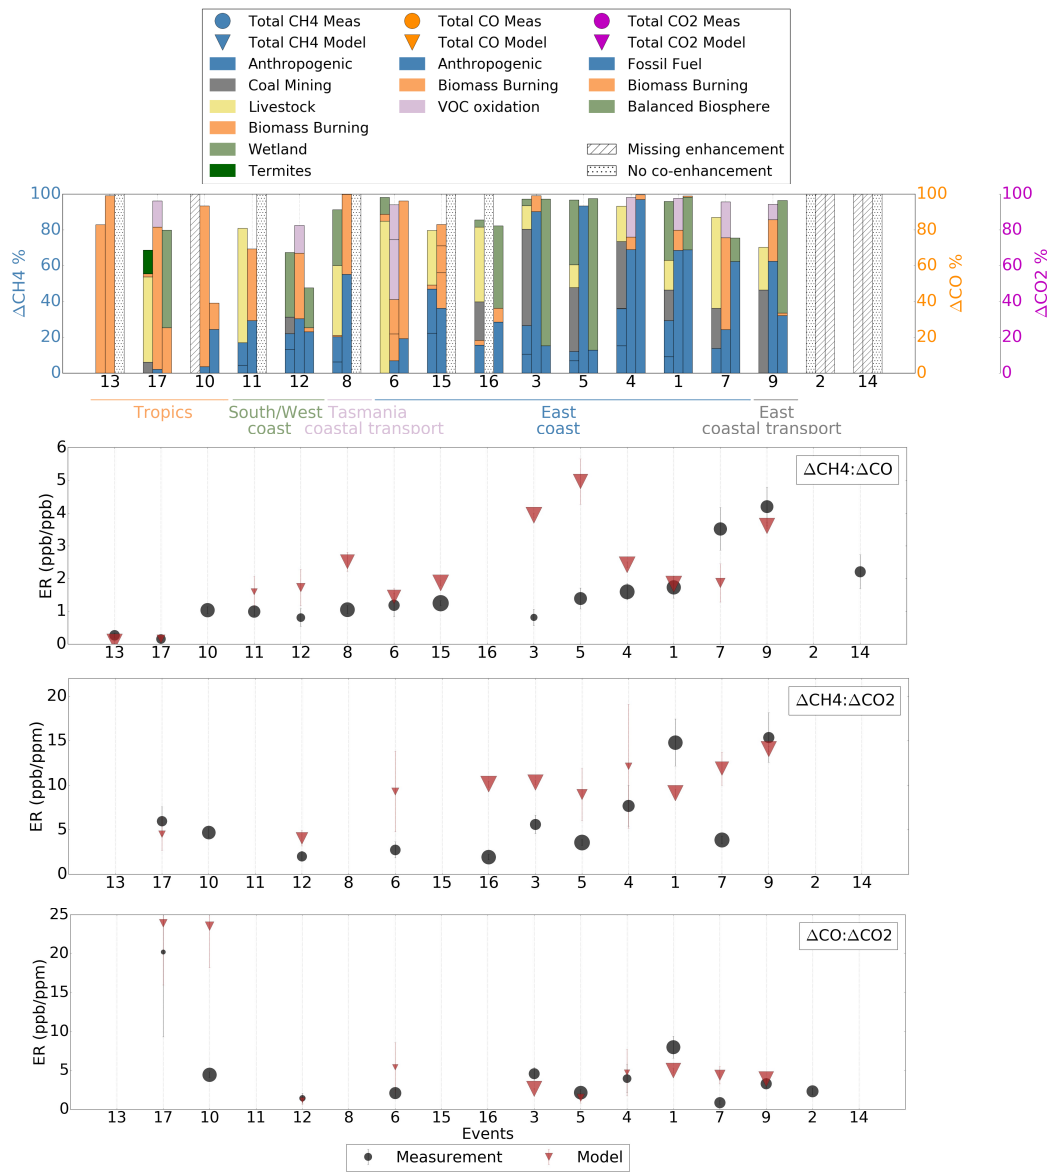

**Figure 8.** The top plot shows the contribution of different tracers (stacked bars) to the modelled enhancements of CH<sub>4</sub> (first bar), CO (second bar) and CO<sub>2</sub> (third bar) for the 17 events when we observed co-enhancements of the measured gases. The bottom plots show the measured (circle) and modelled (triangle) enhancement ratios for  $\Delta\text{CH}_4:\Delta\text{CO}$ ,  $\Delta\text{CH}_4:\Delta\text{CO}_2$  and  $\Delta\text{CO}:\Delta\text{CO}_2$ , the error bars represent the standard error. The size of the markers represents the correlation coefficient between the species during the coincident enhancements. Enhancement ratios and tracer contributions from the model are only shown for events when the model also saw evidence of co-enhancement. The events are ordered based on both the source type and region where it occurred.

## 6.1 Enhancement ratios and source signatures

Figure 8 (top panel) shows the modelled sources that contributed to co-enhancement events from which we derived enhancement ratios. The measured ERs (bottom panels) are shown as circles, with triangles for the corresponding modelled ERs (only for events when the model simulated similar co-enhancements). The difference between the measured and modelled CO<sub>2</sub>, CH<sub>4</sub> and CO enhancements and ERs during each event is shown in Figure S9 (Supplement).

The modelled tracers suggest there is a relationship between the  $\Delta\text{CH}_4:\Delta\text{CO}$  ERs and the sources driving the enhancements. Both the measurements and model showed low ERs for events caused by natural processes (mostly biomass burning, orange), higher ERs for events with mixed natural and anthropogenic signatures, and the highest ERs for events dominated by anthropogenic sources (blue/grey). The balance of sources varies regionally, so the lowest ERs were observed in the tropics due to the impact of stronger natural emissions. Higher ERs were seen along the south and west coasts due to the influence of both natural and anthropogenic sources. We found the highest ERs along the east coast due to the impact of different industrial areas.

The patterns are similar for  $\Delta\text{CH}_4:\Delta\text{CO}_2$  ERs, with higher ERs from anthropogenic processes. For  $\Delta\text{CO}:\Delta\text{CO}_2$  we found the highest ER for event 17, which is driven by biomass burning, suggesting that biomass burning is the process that produces the most CO relative to CO<sub>2</sub> and CH<sub>4</sub>. The lowest measured  $\Delta\text{CO}:\Delta\text{CO}_2$  ERs were identified for events 12 and 7, which derived from anthropogenic sources for both gases combined with additional biomass burning and VOC oxidation for CO and biosphere influence for CO<sub>2</sub>.

The co-enhancements and events detected along the east coast highlight the anthropogenic influence in this part of Australia. 10 events (events 1, 2, 3, 4, 5, 6, 7, 14, 15, 16) were identified along the east coast, all with dominant anthropogenic signature, and one event (event 9) was detected 400 km off the east coast. The measured and modelled ERs seen during event 9 showed similar values, with the modelled tracers suggesting that this enhancement has an anthropogenic origin, and originates from the east coast due to the similar source composition. The ERs along the east coast were mainly overestimated by the model.

One event (event 8) was observed off the northeast coast of Tasmania. Despite being located in the vicinity of the events observed along the east coast, the  $\Delta\text{CH}_4:\Delta\text{CO}$  ER for event 8 is lower than most of the enhancements observed along the east coast. In contrast to the CH<sub>4</sub> source contribution along the east coast, the main CH<sub>4</sub> sources for event 8 are wetlands and livestock, while most of the events along the east coast had coal mining as a dominant source, pointing to a weaker anthropogenic influence from the northeast coast of Tasmania relative to the Australian east coast.

The biggest difference between the measured and modelled ERs when CH<sub>4</sub> was co-emitted was during events 3, 4, 5, 7 and 16 (all located along the east coast). The model overestimated the ERs for events 3, 4, 5 and 16 for both  $\Delta\text{CH}_4:\Delta\text{CO}$  and  $\Delta\text{CH}_4:\Delta\text{CO}_2$ , while for event 7 it overestimated the  $\Delta\text{CH}_4:\Delta\text{CO}_2$  and underestimated the  $\Delta\text{CH}_4:\Delta\text{CO}$  ER. All the events with the highest modelled ERs (when CH<sub>4</sub> is emitted) have coal mining as the dominant source, which suggests that this source was overestimated in the model for events 3, 4, 5, 7 and 16. The fact that the  $\Delta\text{CH}_4:\Delta\text{CO}$  ER during event 7 was underestimated shows that the biomass burning source of CO was too high relative to CH<sub>4</sub> and CO<sub>2</sub>, since the  $\Delta\text{CO}:\Delta\text{CO}_2$  ER was also overestimated by the model.

Prior work on CH<sub>4</sub> showed that globally in EDGARv4.2 anthropogenic emissions from livestock, landfills and other minor sources are underestimated while oil, gas and coal emissions are overestimated, but with underestimates in North America, Wecht et al., 2014; Turner et al., 2015, and overestimates in China (Bergamaschi et al., 2013). However, no similar analysis has been done for Australia, hence the sign and the magnitude of this bias in the Australian region are unknown. Based on  
5 co-variations between CO<sub>2</sub>, CH<sub>4</sub> and CO along the east coast we show that the source from coal mining is also overestimated in Australia. The only event when coal mining was a dominant source and the model showed similar ER as the measurements was during event 9.

Along the south and west coasts, the sources reflect a mixture of anthropogenic and natural emissions. Relative to the east coast, the ERs were lower for these events (events 11 and 12). The source signatures were similar to some events observed along  
10 the east coast with mixed biomass burning and anthropogenic sources, like events 6 and 15. During event 12 the model showed a similar ER as the measurements for  $\Delta\text{CO}:\Delta\text{CO}_2$  and overestimated the  $\Delta\text{CH}_4:\Delta\text{CO}_2$  ER. The  $\Delta\text{CH}_4:\Delta\text{CO}$  ERs were overestimated for both events 11 and 12. This overestimation and the greater difference between the measured and modelled CO enhancements relative to the CO<sub>2</sub> and CH<sub>4</sub> enhancements (Figure S9, Supplement) suggest that the source from biomass burning was underestimated in the model for both events, since biomass burning was the dominant CO source.

15 The north coast and tropics were mostly influenced by biomass burning (events 10, 13, 17). The model reproduced the  $\Delta\text{CH}_4:\Delta\text{CO}$  ER during event 13 (when no CO<sub>2</sub> enhancement was observed), while for event 17 it reproduced the  $\Delta\text{CH}_4:\Delta\text{CO}$  ER, slightly underestimated the  $\Delta\text{CH}_4:\Delta\text{CO}_2$  ER, and overestimated the  $\Delta\text{CO}:\Delta\text{CO}_2$  ER. These differences were potentially caused by the coarse 2° x 2.5° resolution of the GEOS-Chem model. With such coarse resolution, the strength of local sources is diffused. The resolution likely affected event 17, when the observed enhancements were weaker and less distinct than those observed during other events. The model overestimated the  $\Delta\text{CO}:\Delta\text{CO}_2$  ER during event 10. Based on the measured-modelled  
20 enhancement difference (Figure S9, Supplement), the CO enhancement was overestimated by the model and the CO<sub>2</sub> enhancement underestimated. The difference in the modelled ER is hence likely due to the overestimated strength of the biomass burning source in CO and its underestimation in CO<sub>2</sub>, since it was shown as a dominant source. The model did not reproduce the CH<sub>4</sub> enhancement at all for event 10, pointing to a missing source in the model.

## 25 **6.2 Summary of co-enhancements and implications for missing sources**

Using the derived ERs more broadly and linking them to a specific source signature is challenging due to the mixture of sources during the co-enhancement events. From the 17 events only one (event 13) showed contribution from only one source (biomass burning) while all the other co-enhancements were due to a mixture of sources. However, we found these ERs to be representative in identifying the prevailing processes driving the sources (natural, anthropogenic or mixed), determining  
30 sources that are underestimated/overestimated in the model and in identifying the source signatures not captured by the model.

Our biomass burning ER agrees well with known enhancement ratios. The event 13 ER showed a value of 0.27 ppb·ppb<sup>-1</sup> for  $\Delta\text{CH}_4:\Delta\text{CO}$ , similar to the 0.15-0.44 ppb·ppb<sup>-1</sup> range of enhancement ratios from previous studies (Mühle et al., 2002; Mauzerall et al., 1998), but higher than previously measured emission ratios (0.04-0.06 ppb·ppb<sup>-1</sup>, Lawson et al., 2015; Guérette et al., 2018; Paton-Walsh et al., 2014; Smith et al., 2014). This is due to the faster photochemical destruction of

CO by OH relative to CH<sub>4</sub>. The influence of chemical loss leads to lower CO values in the tropics, which result in higher  $\Delta\text{CH}_4:\Delta\text{CO}$  enhancement ratios in comparison to emission ratios.

Events when the model showed similar ERs to the measured ones (events 1, 4, 9) with a strong anthropogenic signature showed a range of ratios of 1.6-4.2 ppb·ppb<sup>-1</sup> for  $\Delta\text{CH}_4:\Delta\text{CO}$ , 8-15 ppb·ppm<sup>-1</sup> for  $\Delta\text{CH}_4:\Delta\text{CO}_2$  and 3.3-8 ppb·ppm<sup>-1</sup> for  $\Delta\text{CO}:\Delta\text{CO}_2$ . These values agree with the range of previously measured ERs from urban and industrial emissions (0.3-13 ppb·ppb<sup>-1</sup> for  $\Delta\text{CH}_4:\Delta\text{CO}$ , 9.8-61 ppb·ppm<sup>-1</sup> for  $\Delta\text{CH}_4:\Delta\text{CO}_2$  and 1.3-37.4 ppb·ppm<sup>-1</sup> for  $\Delta\text{CO}:\Delta\text{CO}_2$ , Buchholz et al., 2016; Niwa et al., 2014; Harris et al., 2000; Chi et al., 2013; Xiao et al., 2004; Bakwin et al., 1995; Takegawa et al., 2004; Sawa et al., 2004; Wada et al., 2011; Lai et al., 2010; Ammoura et al., 2014; Lin et al., 2015).

The highest measured anthropogenic ER, when CH<sub>4</sub> was co-emitted was during event 9, with significant contribution from coal burning (4 ppb·ppb<sup>-1</sup> for  $\Delta\text{CH}_4:\Delta\text{CO}$ , 15 ppb·ppm<sup>-1</sup> for  $\Delta\text{CH}_4:\Delta\text{CO}_2$ ). Our values are lower than the ERs reported by Buchholz et al. (2016) (13 ppb·ppb<sup>-1</sup>, 61 ppb·ppm<sup>-1</sup>) at a single measurement site (Wollongong); however, they noted that their values were higher than known ERs due to the close proximity of the measurement site to coal seams and related mining. Additionally, for our event 9 we also observe other sources types (e.g., livestock for CH<sub>4</sub>) that would impact the overall ERs.

Events with a mixture of natural and anthropogenic sources (events 11, 12, 17), with values close to the modelled ERs, showed a range of ratios of 0.2-1 ppb·ppb<sup>-1</sup> for  $\Delta\text{CH}_4:\Delta\text{CO}$ , 2-6 ppb·ppm<sup>-1</sup> for  $\Delta\text{CH}_4:\Delta\text{CO}_2$  and 1.4-20 ppb·ppm<sup>-1</sup> for  $\Delta\text{CO}:\Delta\text{CO}_2$ , similar to the reported values of 0.3-2.2 ppb·ppb<sup>-1</sup> for  $\Delta\text{CH}_4:\Delta\text{CO}$ , 19 ppb·ppm<sup>-1</sup> for  $\Delta\text{CH}_4:\Delta\text{CO}_2$  and 0.01-29.30 ppb·ppm<sup>-1</sup> for  $\Delta\text{CO}:\Delta\text{CO}_2$  (Buchholz et al., 2016; Lin et al., 2015; Lai et al., 2010; Russo et al., 2003).

Based on our derived ERs we identified missing sources in the model during events 2, 14 and 10. Events 2 and 14 correspond to a similar region along the east coast, but with one year difference. Both events were observed along the east coast, where we found the most anthropogenic co-enhancement events. Event 2 was observed in 2012, and its measured ER was similar to the ER corresponding to event 5. This suggests that this missing source is a combination of anthropogenic (fossil and biofuel) emissions, with an additional natural biosphere source for CO<sub>2</sub>. The ER for event 14 in 2013 shows a value closest to the modelled ER during event 4, which was observed in the same region in 2012. The modelled sources point mainly to an anthropogenic signature of the missing source for both CH<sub>4</sub> (oil, gas, coal mining, livestock) and CO (fossil and biofuel) during this event. The measurements showed enhancements for all three gases during event 10, but the model failed to capture the CH<sub>4</sub> enhancement. The sources of CO<sub>2</sub> and CO suggest that the missing CH<sub>4</sub> source is a combination of biomass burning and anthropogenic sources, with biomass burning being the dominant source, while the similarity between the measured ERs during events 10, 6 and 11 suggest there is also a significant livestock contribution.

## 7 Conclusions

We have used in-situ FTIR measurements collected in two consecutive years from a ship that circumnavigated Australia to construct near-surface atmospheric CO<sub>2</sub>, CH<sub>4</sub> and CO distributions around Australia. Using tagged simulations from the GEOS-Chem model, we estimated the contribution of different sources to the total and background amounts of each gas and identified the drivers of their short-term enhancements. Co-variations between the different measured and modelled gases were

used to identify common sources of all three carbon greenhouse gases and to understand the origin of the differences between measured and modelled quantities. Based on the co-variations we constrained relevant processes for all three gases.

We found significant regional variability in the dominant source contributions along the Australian coast. The Australian east coast was dominated by anthropogenic sources, the south and west coasts showed a mixture of anthropogenic sources and biomass burning, and the north coast was influenced primarily by natural sources (biomass burning) for CO, anthropogenic (fossil fuel) for CO<sub>2</sub> and a mixture of anthropogenic and natural sources for CH<sub>4</sub>. Clean air characteristic of the tropospheric background was observed away from the coast in the Indian Ocean, Coral Sea, and Tasman Sea. From the measurements in the Indian Ocean, we found that the background values of all three gases increase towards the tropics with latitudinal gradients of  $0.019 \pm 0.003$  ppm deg<sup>-1</sup> for CO<sub>2</sub>,  $0.34 \pm 0.02$  ppb deg<sup>-1</sup> for CH<sub>4</sub> and  $0.82 \pm 0.05$  ppb deg<sup>-1</sup> for CO.

Our model results suggest that fossil fuels ( $69.9 \pm 0.2\%$ ) followed by biomass burning ( $18.7 \pm 0.1\%$ ) contributed the most to total CO<sub>2</sub> and its background values. For CH<sub>4</sub>, wetlands ( $33.1 \pm 0.1\%$ ) were identified as the largest background source, followed by emissions from livestock ( $20.59 \pm 0.05\%$ ), oil and gas ( $12.01 \pm 0.03\%$ ) and waste ( $10.90 \pm 0.01\%$ ). For CO, secondary chemical production from CH<sub>4</sub> and NMVOCs were the biggest contributors to the background ( $70 \pm 2\%$ ). Episodic enhancements in CO<sub>2</sub> and CH<sub>4</sub> were largely driven by similar sources to the background amounts, although for CH<sub>4</sub>, the anthropogenic sources more strongly influenced the enhancements than the background. The CO enhancements were driven by primary CO emissions from biomass burning and anthropogenic sources, with stronger influence from Australian sources than from transported sources. While the short-term enhancements were driven by local sources, overall we found that sources transported from other regions greatly affect the total amounts of these gases in Australia. For CO,  $68 \pm 12\%$  of the total biomass burning contribution is attributed to transported amounts, mainly from Africa and South America, and  $90 \pm 6\%$  of the total anthropogenic contribution is from transported amounts, with the greatest contribution from South America. Transport from the northern hemisphere was observed closer to the tropics from regions including Asia, Indonesia and elsewhere in the northern hemisphere.

We observed similar enhancement patterns for CO<sub>2</sub>, CH<sub>4</sub>, and CO along the measurement path, pointing to coincident enhancements of these gases. Based on these coincident enhancements, we derived measured and modelled enhancement ratios (ERs) for 17 events and we used the model to identify the source contributions for each event. We found the most events along the east coast, followed by the tropical north coast. The  $\Delta\text{CH}_4:\Delta\text{CO}_2$  ERs showed a dependence on both source type and region. We found low ERs for events caused by natural processes, such as biomass burning (tropics and northern Australia), higher ERs for events with mixed natural and anthropogenic sources (south and west coasts) and the highest ERs for events dominated by anthropogenic sources (east coast). The  $\Delta\text{CH}_4:\Delta\text{CO}$  ERs also showed higher values for the enhancements that mainly originated from anthropogenic processes. For  $\Delta\text{CO}:\Delta\text{CO}_2$  we found the highest ERs for events driven by biomass burning and the lowest ERs for events that derived from a combination of anthropogenic sources for both gases along with biomass burning and VOC oxidation for CO and biosphere influence for CO<sub>2</sub>. For events when the model showed similar ERs to the measurements, our ratios agreed well with known ERs.

Assumptions in the simulations, lack of time-specific emissions and the influence of numerical diffusion on the transport can all introduce uncertainties in the modelled results. Our model results captured the distribution of the measured amounts and



the main sources driving the changes of all three gases, but some discrepancies remain. Based on the measured and modelled ERs, we identified the source signature of the events that were not reproduced by the model. We found coal burning to be over-estimated for CH<sub>4</sub> and biomass burning generally underestimated for all three gases, although with CO overestimates during some events. We attributed the missing sources during events that were not reproduced by the model to mainly anthropogenic sources for CO and CO<sub>2</sub> and oil, gas, coal and livestock for CH<sub>4</sub>. The exception is along the tropical north coast, where biomass burning is the main underestimated source for all three gases.

Processes driving carbon greenhouse gas changes in Australia have a large impact on the global carbon cycle and our climate (Poulter et al., 2014; Ma et al., 2016; Haverd et al., 2017), hence constraints on these processes are essential for predicting future climate change scenarios. Our results show that focusing on simultaneous measurements rather than individual species provides useful additional information in estimating source profiles and contributions. We have shown that the co-variation of CO<sub>2</sub>, CH<sub>4</sub> and CO can be used to constrain the sources of individual gases, as well to identify the drivers of the enhancements that are not reproduced by models, guiding future model development.

## 8 Data availability

All GEOS-Chem model output is available from the authors upon request. GEOS-Chem is an open-source model and the code is publicly available ([wiki.seas.harvard.edu/geos-chem/index.php/Downloading\\_GEOS-Chem\\_source\\_code\\_and\\_data](http://wiki.seas.harvard.edu/geos-chem/index.php/Downloading_GEOS-Chem_source_code_and_data)). Ship data was provided by DK and the data will be published in Earth System Science Data and publicly available in Pangaea. The MODIS data were downloaded from [https://neo.sci.gsfc.nasa.gov/view.php?datasetId=MOD14A1\\_M\\_FIRE&year=2017](https://neo.sci.gsfc.nasa.gov/view.php?datasetId=MOD14A1_M_FIRE&year=2017).

*Author contributions.* BB ran the GEOS-Chem simulations, wrote the codes for all the calculations, performed the analysis, and led the writing of the paper under the supervision and guidance of NMD and JAF. The ship measurements were provided by DK and DWTG who prepared the FTIR analyser. The observational data set was analysed by DK, DWTG and CPW. All authors contributed to editing and revising the manuscript.

*Competing interests.* The authors declare that they have no conflict of interest.

*Acknowledgements.* We acknowledge Australian Research Council (ARC) funding in the form of Discovery Project DP110101948 and Marine National Facility (MNF) transit voyages grants for ship time on three voyages for “Transect Measurements of Greenhouse Gases in the Marine Atmosphere”. The authors are grateful to the CSIRO-MNF technical team for the successful realisation of the measurement setup and their great support during the voyages. We appreciate the good cooperation with the P&O crew and their helpful hands. We are also grateful to Graham Kettlewell for the help with the instrument installation aboard the ship. We acknowledge the NOAA ESRL Global Monitoring Division, Boulder, Colorado, USA (<http://esrl.noaa.gov/gmd/>) for providing the different background site data. We are also grateful for the MODIS mission scientists and associated NASA personnel for the production of their data used in this research, obtained from NASA Earth Observations (NEO) that is part of the EOS Project Science Office at the NASA Goddard Space Flight Center. This

research was undertaken with the assistance of resources provided at the NCI National Facility systems at the Australian National University through the National Computational Merit Allocation Scheme supported by the Australian Government. The PhD position is supported by a Discovery Early Career Researcher (DECRA) University Postgraduate Award from the University of Wollongong and the research undertaken during the PhD is supported by the ARC Grants DE140100178 and DP160101598.

## References

- Ammoura, L., Xueref-Remy, I., Gros, V., Baudic, A., Bonsang, B., Petit, J.-E., Perrussel, O., Bonnaire, N., Sciare, J., and Chevallier, F.: Atmospheric measurements of ratios between CO<sub>2</sub> and co-emitted species from traffic: a tunnel study in the Paris megacity, *Atmospheric Chemistry and Physics*, 14, 12 871–12 882, 2014.
- 5 Andreae, M. O. and Merlet, P.: Emission of trace gases and aerosols from biomass burning, *Global biogeochemical cycles*, 15, 955–966, 2001.
- Baker, D., Law, R. M., Gurney, K., Rayner, P., Peylin, P., Denning, A., Bousquet, P., Bruhwiler, L., Chen, Y.-H., Ciais, P., et al.: TransCom 3 inversion intercomparison: Impact of transport model errors on the interannual variability of regional CO<sub>2</sub> fluxes, 1988–2003, *Global Biogeochemical Cycles*, 20, 2006.
- 10 Bakwin, P. S., Tans, P. P., Zhao, C., USSLER III, W., and Quesnell, E.: Measurements of carbon dioxide on a very tall tower, *Tellus B*, 47, 535–549, 1995.
- Bergamaschi, P., Houweling, S., Segers, A., Krol, M., Frankenberg, C., Scheepmaker, R., Dlugokencky, E., Wofsy, S., Kort, E., Sweeney, C., et al.: Atmospheric CH<sub>4</sub> in the first decade of the 21st century: Inverse modeling analysis using SCIAMACHY satellite retrievals and NOAA surface measurements, *Journal of Geophysical Research: Atmospheres*, 118, 7350–7369, 2013.
- 15 Bey, I., Jacob, D. J., Yantosca, R. M., Logan, J. A., Field, B. D., Fiore, A. M., Li, Q., Liu, H. Y., Mickley, L. J., and Schultz, M. G.: Global modeling of tropospheric chemistry with assimilated meteorology: Model description and evaluation, *Journal of Geophysical Research: Atmospheres*, 106, 23 073–23 095, 2001.
- Bloom, A. A., Bowman, K. W., Lee, M., Turner, A. J., Schroeder, R., Worden, J. R., Weidner, R., McDonald, K. C., and Jacob, D. J.: A global wetland methane emissions and uncertainty dataset for atmospheric chemical transport models (WetCHARTs version 1.0), *Geoscientific Model Development*, 10, 2141, 2017.
- 20 Bolshcer, M. et al.: RETRO deliverable D1-6, RETRO documentation, 2007.
- Bousquet, P., Ciais, P., Miller, J., Dlugokencky, E. J., Hauglustaine, D., Prigent, C., Van der Werf, G., Peylin, P., Brunke, E.-G., Carouge, C., et al.: Contribution of anthropogenic and natural sources to atmospheric methane variability, *Nature*, 443, 439, 2006.
- Buchholz, R., Paton-Walsh, C., Griffith, D., Kubistin, D., Caldow, C., Fisher, J., Deutscher, N., Kettlewell, G., Riggenbach, M., Macatangay, R., et al.: Source and meteorological influences on air quality (CO, CH<sub>4</sub> & CO<sub>2</sub>) at a Southern Hemisphere urban site, *Atmospheric Environment*, 126, 274–289, 2016.
- 25 Chi, X., Winderlich, J., Mayer, J.-C., Panov, A., Heimann, M., Birmili, W., Heintzenberg, J., Cheng, Y., and Andreae, M.: Long-term measurements of aerosol and carbon monoxide at the ZOTTO tall tower to characterize polluted and pristine air in the Siberian taiga, *Atmospheric Chemistry and Physics*, 13, 12 271–12 298, 2013.
- 30 Ciais, P., Borges, A. V., Abril, G., Meybeck, M., Folberth, G., Hauglustaine, D., and Janssens, I. A.: The impact of lateral carbon fluxes on the European carbon balance, *Biogeosciences*, 5, 1259–1271, doi:10.5194/bg-5-1259-2008, <https://www.biogeosciences.net/5/1259/2008/>, 2008.
- Dalal, R., Allen, D., Livesley, S., and Richards, G.: Magnitude and biophysical regulators of methane emission and consumption in the Australian agricultural, forest, and submerged landscapes: a review, *Plant and Soil*, 309, 43–76, 2008.
- 35 Darmenov, A. and da Silva, A.: The quick fire emissions dataset (QFED)—documentation of versions 2.1, 2.2 and 2.4, NASA Technical Report Series on Global Modeling and Data Assimilation, NASA TM-2013-104606, 32, 183, 2015.

- Deutscher, N., Sherlock, V., Mikaloff Fletcher, S., Griffith, D., Notholt, J., Macatangay, R., Connor, B. J., Robinson, J., Shiona, H., Velasco, V. A., et al.: Drivers of column-average CO<sub>2</sub> variability at Southern Hemispheric total carbon column observing network sites, *Atmospheric Chemistry and Physics*, 14, 9883–9901, 2014.
- Deutscher, N. M., Griffith, D. W., Paton-Walsh, C., and Borah, R.: Train-borne measurements of tropical methane enhancements from ephemeral wetlands in Australia, *Journal of Geophysical Research: Atmospheres*, 115, 2010.
- Dlugokencky, E. J., Lang, P. M., Crotwell, A. M., Mund, J. W., Crotwell, M. J., and Thoning, K. W.: Atmospheric Methane Dry Air Mole Fractions from the NOAA ESRL Carbon Cycle Cooperative Global Air Sampling Network, 1983-2017, Version: 2018-08-01, 2018a.
- Dlugokencky, E. J., Lang, P. M., Mund, J. W., Crotwell, A. M., Crotwell, M. J., and Thoning, K. W.: Atmospheric Carbon Dioxide Dry Air Mole Fractions from the NOAA ESRL Carbon Cycle Cooperative Global Air Sampling Network, 1968-2017, Version: 2018-07-31, 2018b.
- Duncan, B., Logan, J., Bey, I., Megretskaia, I., Yantosca, R., Novelli, P., Jones, N. B., and Rinsland, C.: Global budget of CO, 1988–1997: Source estimates and validation with a global model, *Journal of Geophysical Research: Atmospheres*, 112, 2007.
- Edwards, D., Emmons, L., Gille, J., Chu, A., Attie, J.-L., Giglio, L., Wood, S., Haywood, J., Deeter, M., Massie, S., et al.: Satellite-observed pollution from Southern Hemisphere biomass burning, *Journal of Geophysical Research: Atmospheres*, 111, 2006a.
- Edwards, D., Pétron, G., Novelli, P., Emmons, L., Gille, J., and Drummond, J.: Southern Hemisphere carbon monoxide interannual variability observed by Terra/Measurement of Pollution in the Troposphere (MOPITT), *Journal of Geophysical Research: Atmospheres*, 111, 2006b.
- Enting, I. and Mansbridge, J.: Latitudinal distribution of sources and sinks of CO<sub>2</sub>: Results of an inversion study, *Tellus B*, 43, 156–170, 1991.
- Esler, M. B., Griffith, D. W., Wilson, S. R., and Steele, L. P.: Precision trace gas analysis by FT-IR spectroscopy. 1. Simultaneous analysis of CO<sub>2</sub>, CH<sub>4</sub>, N<sub>2</sub>O, and CO in air, *Analytical Chemistry*, 72, 206–215, 2000.
- Fisher, J. A., Murray, L. T., Jones, D. B. A., and Deutscher, N. M.: Improved method for linear carbon monoxide simulation and source attribution in atmospheric chemistry models illustrated using GEOS-Chem v9, *Geoscientific Model Development Discussions*, 2017, 1–24, doi:10.5194/gmd-2017-94, <http://www.geosci-model-dev-discuss.net/gmd-2017-94/>, 2017.
- Folberth, G., Hauglustaine, D., Ciais, P., and Lathiere, J.: On the role of atmospheric chemistry in the global CO<sub>2</sub> budget, *Geophysical research letters*, 32, 2005.
- Fraser, A., Chan Miller, C., Palmer, P. I., Deutscher, N. M., Jones, N. B., and Griffith, D. W.: The Australian methane budget: Interpreting surface and train-borne measurements using a chemistry transport model, *Journal of Geophysical Research: Atmospheres* (1984–2012), 116, 2011.
- Fung, I., John, J., Lerner, J., Matthews, E., Prather, M., Steele, L., and Fraser, P.: Three-dimensional model synthesis of the global methane cycle, *Journal of Geophysical Research: Atmospheres*, 96, 13 033–13 065, 1991.
- Gloudemans, A., Krol, M., Meirink, J., De Laat, A., Van der Werf, G., Schrijver, H., Van den Broek, M., and Aben, I.: Evidence for long-range transport of carbon monoxide in the Southern Hemisphere from SCIAMACHY observations, *Geophysical research letters*, 33, 2006.
- Gregory, G., Westberg, D., Shipham, M., Blake, D., Newell, R., Fuelberg, H., Talbot, R., Heikes, B., Atlas, E., Sachse, G., et al.: Chemical characteristics of Pacific tropospheric air in the region of the Intertropical Convergence Zone and South Pacific Convergence Zone, *Journal of Geophysical Research: Atmospheres*, 104, 5677–5696, 1999.
- Griffith, D., Deutscher, N., Caldwell, C., Kettlewell, G., Rigggenbach, M., and Hammer, S.: A Fourier transform infrared trace gas and isotope analyser for atmospheric applications, *Atmospheric Measurement Techniques*, 5, 2481–2498, 2012.
- Griffith, D. W.: Synthetic calibration and quantitative analysis of gas-phase FT-IR spectra, *Applied spectroscopy*, 50, 59–70, 1996.

- Guenther, A., Jiang, X., Heald, C., Sakulyanontvittaya, T., Duhl, T., Emmons, L., and Wang, X.: The Model of Emissions of Gases and Aerosols from Nature version 2.1 (MEGAN2. 1): an extended and updated framework for modeling biogenic emissions, 2012.
- Guérette, E.-A., Paton-Walsh, C., Desservettaz, M., Smith, T. E. L., Volkova, L., Weston, C. J., and Meyer, C. P.: Emissions of trace gases from Australian temperate forest fires: emission factors and dependence on modified combustion efficiency, *Atmospheric Chemistry and Physics*, 18, 3717–3735, doi:10.5194/acp-18-3717-2018, <https://www.atmos-chem-phys.net/18/3717/2018/>, 2018.
- 5 Hamilton, J. F., Allen, G., Watson, N. M., Lee, J. D., Saxton, J. E., Lewis, A. C., Vaughan, G., Bower, K. N., Flynn, M. J., Crosier, J., et al.: Observations of an atmospheric chemical equator and its implications for the tropical warm pool region, *Journal of Geophysical Research: Atmospheres*, 113, 2008.
- Harris, J., Dlugokencky, E., Oltmans, S., Tans, P., Conway, T., Novelli, P., Thoning, K., and Kahl, J.: An interpretation of trace gas correlations during Barrow, Alaska, winter dark periods, 1986–1997, *Journal of Geophysical Research: Atmospheres*, 105, 17 267–17 278, 2000.
- 10 Haverd, V., Ahlström, A., Smith, B., and Canadell, J. G.: Carbon cycle responses of semi-arid ecosystems to positive asymmetry in rainfall, *Global change biology*, 23, 793–800, 2017.
- Heimann, M. and Reichstein, M.: Terrestrial ecosystem carbon dynamics and climate feedbacks, *Nature*, 451, 289, 2008.
- Hewitt, C. and Harrison, R. M.: Tropospheric concentrations of the hydroxyl radical—a review, *Atmospheric Environment* (1967), 19, 545–554, 1985.
- 15 Jones, N. B., Rinsland, C. P., Liley, J. B., and Rosen, J.: Correlation of aerosol and carbon monoxide at 45 S: Evidence of biomass burning emissions, *Geophysical research letters*, 28, 709–712, 2001.
- Kuhns, H., Knipping, E. M., and Vukovich, J. M.: Development of a United States–Mexico emissions inventory for the big bend regional aerosol and visibility observational (BRAVO) study, *Journal of the Air & Waste Management Association*, 55, 677–692, 2005.
- 20 Lai, S., Baker, A., Schuck, T., Velthoven, P. v., Oram, D., Zahn, A., Hermann, M., Weigelt, A., Slemr, F., Brenninkmeijer, C., et al.: Pollution events observed during CARIBIC flights in the upper troposphere between South China and the Philippines, *Atmospheric Chemistry and Physics*, 10, 1649–1660, 2010.
- Lawson, S. J., Keywood, M. D., Galbally, I. E., Gras, J. L., Caine, J. M., Cope, M. E., Krummel, P. B., Fraser, P. J., Steele, L. P., Bentley, S. T., Meyer, C. P., Ristovski, Z., and Goldstein, A. H.: Biomass burning emissions of trace gases and particles in marine air at Cape Grim, Tasmania, *Atmospheric Chemistry and Physics*, 15, 13 393–13 411, doi:10.5194/acp-15-13393-2015, <https://www.atmos-chem-phys.net/15/13393/2015/>, 2015.
- 25 Lee, C., Martin, R. V., van Donkelaar, A., Lee, H., Dickerson, R. R., Hains, J. C., Krotkov, N., Richter, A., Vinnikov, K., and Schwab, J. J.: SO<sub>2</sub> emissions and lifetimes: Estimates from inverse modeling using in situ and global, space-based (SCIAMACHY and OMI) observations, *Journal of Geophysical Research: Atmospheres*, 116, 2011.
- 30 Li, M., Zhang, Q., Kurokawa, J.-i., Woo, J.-H., He, K., Lu, Z., Ohara, T., Song, Y., Streets, D. G., Carmichael, G. R., et al.: MIX: a mosaic Asian anthropogenic emission inventory under the international collaboration framework of the MICS-Asia and HTAP, *Atmospheric Chemistry and Physics*, 17, 935, 2017.
- Lin, X., Indira, N. K., Ramonet, M., Delmotte, M., Ciais, P., Bhatt, B. C., Reddy, M. V., Angchuk, D., Balakrishnan, S., Jorphail, S., Dorjai, T., Mahey, T. T., Patnaik, S., Begum, M., Brenninkmeijer, C., Durairaj, S., Kirubakaran, R., Schmidt, M., Swathi, P. S., Vinithkumar, N. V., Yver Kwok, C., and Gaur, V. K.: Long-lived atmospheric trace gases measurements in flask samples from three stations in India, *Atmospheric Chemistry and Physics*, 15, 9819–9849, doi:10.5194/acp-15-9819-2015, <https://www.atmos-chem-phys.net/15/9819/2015/>, 2015.
- 35

- Loh, Z., Law, R., Haynes, K., Krummel, P., Steele, L., Fraser, P., Chambers, S., and Williams, A.: Simulations of atmospheric methane for Cape Grim, Tasmania, to constrain southeastern Australian methane emissions, *Atmospheric Chemistry and Physics*, 15, 305–317, 2015.
- Ma, X., Huete, A., Cleverly, J., Eamus, D., Chevallier, F., Joiner, J., Poulter, B., Zhang, Y., Guanter, L., Meyer, W., et al.: Drought rapidly diminishes the large net CO<sub>2</sub> uptake in 2011 over semi-arid Australia, *Scientific Reports*, 6, 2016.
- 5 Mauzerall, D. L., Logan, J. A., Jacob, D. J., Anderson, B. E., Blake, D. R., Bradshaw, J. D., Heikes, B., Sachse, G. W., Singh, H., and Talbot, B.: Photochemistry in biomass burning plumes and implications for tropospheric ozone over the tropical South Atlantic, *Journal of Geophysical Research: Atmospheres*, 103, 8401–8423, 1998.
- McConnell, J., McElroy, M., and Wofsy, S.: Natural sources of atmospheric CO, *Nature*, 233, 187, 1971.
- Messerschmidt, J., Parazoo, N., Deutscher, N., Roehl, C., Warneke, T., Wennberg, P., and Wunch, D.: Evaluation of atmosphere-biosphere exchange estimations with TCCON measurements, *Atmos. Chem. Phys. Discuss*, 12, 12 759–12 800, 2012.
- 10 Mühle, J., Brenninkmeijer, C., Rhee, T., Slemr, F., Oram, D., Penkett, S., and Zahn, A.: Biomass burning and fossil fuel signatures in the upper troposphere observed during a CARIBIC flight from Namibia to Germany, *Geophysical research letters*, 29, 16–1, 2002.
- Nara, H., Tanimoto, H., Nojiri, Y., Mukai, H., Zeng, J., Tohjima, Y., and Machida, T.: CO emissions from biomass burning in South-east Asia in the 2006 El Nino year: shipboard and AIRS satellite observations, *Environmental Chemistry*, 8, 213–223, 2011.
- 15 Nassar, R., Jones, D. B. A., Suntharalingam, P., Chen, J. M., Andres, R. J., Wecht, K. J., Yantosca, R. M., Kulawik, S. S., Bowman, K. W., Worden, J. R., Machida, T., and Matsueda, H.: Modeling global atmospheric CO<sub>2</sub> with improved emission inventories and CO<sub>2</sub> production from the oxidation of other carbon species, *Geoscientific Model Development*, 3, 689–716, doi:10.5194/gmd-3-689-2010, <http://www.geosci-model-dev.net/3/689/2010/>, 2010.
- Nassar, R., Napier-Linton, L., Gurney, K. R., Andres, R. J., Oda, T., Vogel, F. R., and Deng, F.: Improving the temporal and spatial distribution of CO<sub>2</sub> emissions from global fossil fuel emission data sets, *Journal of Geophysical Research: Atmospheres*, 118, 917–933, 2013.
- 20 Niwa, Y., Tsuboi, K., Matsueda, H., Sawa, Y., Machida, T., Nakamura, M., Kawasato, T., Saito, K., Takatsuji, S., Tsuji, K., et al.: Seasonal variations of CO<sub>2</sub>, CH<sub>4</sub>, N<sub>2</sub>O and CO in the mid-troposphere over the western North Pacific observed using a C-130H cargo aircraft, *Journal of the Meteorological Society of Japan. Ser. II*, 92, 55–70, 2014.
- Oda, T. and Maksyutov, S.: A very high-resolution (1 km × 1 km) global fossil fuel CO<sub>2</sub> emission inventory derived using a point source database and satellite observations of nighttime lights, *Atmospheric Chemistry and Physics*, 11, 543–556, 2011.
- 25 Park, R. J., Jacob, D. J., Field, B. D., Yantosca, R. M., and Chin, M.: Natural and transboundary pollution influences on sulfate-nitrate-ammonium aerosols in the United States: Implications for policy, *Journal of Geophysical Research: Atmospheres*, 109, 2004.
- Parker, R. J., Boesch, H., Wooster, M. J., Moore, D. P., Webb, A. J., Gaveau, D., and Murdiyarso, D.: Atmospheric CH<sub>4</sub> and CO<sub>2</sub> enhancements and biomass burning emission ratios derived from satellite observations of the 2015 Indonesian fire plumes, *Atmospheric Chemistry and Physics*, 16, 10 111–10 131, doi:10.5194/acp-16-10111-2016, <https://www.atmos-chem-phys.net/16/10111/2016/>, 2016.
- 30 Paton-Walsh, C., Deutscher, N. M., Griffith, D., Forgan, B., Wilson, S., Jones, N., and Edwards, D.: Trace gas emissions from savanna fires in northern Australia, *Journal of Geophysical Research: Atmospheres*, 115, 2010.
- Paton-Walsh, C., Smith, T., Young, E., Griffith, D. W., and Guérette, É.-A.: New emission factors for Australian vegetation fires measured using open-path Fourier transform infrared spectroscopy—Part 1: Methods and Australian temperate forest fires, *Atmospheric Chemistry and Physics*, 14, 11 313–11 333, 2014.
- 35 Popa, M. E., Vollmer, M. K., Jordan, A., Brand, W. A., Pathirana, S. L., Rothe, M., and Röckmann, T.: Vehicle emissions of greenhouse gases and related tracers from a tunnel study: CO : CO<sub>2</sub>, N<sub>2</sub>O : CO<sub>2</sub>, CH<sub>4</sub> : CO<sub>2</sub>, O<sub>2</sub> : CO<sub>2</sub> ratios, and the stable isotopes <sup>13</sup>C and <sup>18</sup>O in

- CO<sub>2</sub> and CO, *Atmospheric Chemistry and Physics*, 14, 2105–2123, doi:10.5194/acp-14-2105-2014, <https://www.atmos-chem-phys.net/14/2105/2014/>, 2014.
- Poulter, B., Frank, D., Ciais, P., Myneni, R. B., Andela, N., Bi, J., Broquet, G., Canadell, J. G., Chevallier, F., Liu, Y. Y., et al.: Contribution of semi-arid ecosystems to interannual variability of the global carbon cycle, *Nature*, 509, 600–603, 2014.
- 5 Ridder, T., Gerbig, C., Notholt, J., Rex, M., Schrems, O., Warneke, T., and Zhang, L.: Ship-borne FTIR measurements of CO and O<sub>3</sub> in the Western Pacific from 43° N to 35° S: an evaluation of sources, *Atmospheric Chemistry and Physics*, 12, 815–828, 2012.
- Russo, R., Talbot, R., Dibb, J. E., Scheuer, E., Seid, G., Jordan, C., Fuelberg, H., Sachse, G., Avery, M., Vay, S., et al.: Chemical composition of Asian continental outflow over the western Pacific: Results from Transport and Chemical Evolution over the Pacific (TRACE-P), *Journal of Geophysical Research: Atmospheres*, 108, 2003.
- 10 Sawa, Y., Matsueda, H., Makino, Y., Inoue, H., Murayama, S., Hirota, M., Tsutsumi, Y., Zaizen, Y., Ikegami, M., and Okada, K.: Aircraft Observation of CO<sub>2</sub>, CO<sub>2</sub> O<sub>3</sub> and H<sub>2</sub> over the North Pacific during the PACE-7 Campaign, *Tellus B: Chemical and Physical Meteorology*, 56, 2–20, 2004.
- Smith, T., Paton-Walsh, C., Meyer, C., Cook, G., Maier, S. W., Russell-Smith, J., Wooster, M., and Yates, C.: New emission factors for Australian vegetation fires measured using open-path Fourier transform infrared spectroscopy-Part 2: Australian tropical savanna fires, 15 2014.
- Stehr, J., Ball, W., Dickerson, R., Doddridge, B., Piety, C., and Johnson, J.: Latitudinal gradients in O<sub>3</sub> and CO during INDOEX 1999, *Journal of Geophysical Research: Atmospheres*, 107, 2002.
- Stettler, M., Eastham, S., and Barrett, S.: Air quality and public health impacts of UK airports. Part I: Emissions, *Atmospheric environment*, 45, 5415–5424, 2011.
- 20 Suntharalingam, P., Jacob, D. J., Palmer, P. I., Logan, J. A., Yantosca, R. M., Xiao, Y., Evans, M. J., Streets, D. G., Vay, S. L., and Sachse, G. W.: Improved quantification of Chinese carbon fluxes using CO<sub>2</sub>/CO correlations in Asian outflow, *Journal of Geophysical Research: Atmospheres*, 109, 2004.
- Takahashi, T., Sutherland, S. C., Wanninkhof, R., Sweeney, C., Feely, R. A., Chipman, D. W., Hales, B., Friederich, G., Chavez, F., Sabine, C., et al.: Climatological mean and decadal change in surface ocean pCO<sub>2</sub>, and net sea–air CO<sub>2</sub> flux over the global oceans, *Deep Sea 25 Research Part II: Topical Studies in Oceanography*, 56, 554–577, 2009.
- Takegawa, N., Kondo, Y., Koike, M., Chen, G., Machida, T., Watai, T., Blake, D., Streets, D., Woo, J.-H., Carmichael, G., et al.: Removal of NO<sub>x</sub> and NO<sub>y</sub> in Asian outflow plumes: Aircraft measurements over the western Pacific in January 2002, *Journal of Geophysical Research: Atmospheres*, 109, 2004.
- Té, Y., Jeseck, P., Franco, B., Mahieu, E., Jones, N., Paton-Walsh, C., Griffith, D. W., Buchholz, R. R., Hadji-Lazaro, J., Hurtmans, D., 30 et al.: Seasonal variability of surface and column carbon monoxide over the megacity Paris, high-altitude Jungfrauoch and Southern Hemispheric Wollongong stations, *Atmospheric Chemistry and Physics*, 16, 10911–10925, 2016.
- Turnbull, J. C., Karion, A., Fischer, M. L., Faloona, I., Guilderson, T., Lehman, S. J., Miller, B. R., Miller, J. B., Montzka, S., Sherwood, T., Saripalli, S., Sweeney, C., and Tans, P. P.: Assessment of fossil fuel carbon dioxide and other anthropogenic trace gas emissions from airborne measurements over Sacramento, California in spring 2009, *Atmospheric Chemistry and Physics*, 11, 705–721, doi:10.5194/acp-35 11-705-2011, <https://www.atmos-chem-phys.net/11/705/2011/>, 2011.
- Turner, A. J., Jacob, D. J., Wecht, K. J., Maasackers, J. D., Lundgren, E., Andrews, A. E., Biraud, S. C., Boesch, H., Bowman, K. W., Deutscher, N. M., Dubey, M. K., Griffith, D. W. T., Hase, F., Kuze, A., Notholt, J., Ohyama, H., Parker, R., Payne, V. H., Sussmann, R., Sweeney, C., Velasco, V. A., Warneke, T., Wennberg, P. O., and Wunch, D.: Estimating global and North American methane emissions with

- high spatial resolution using GOSAT satellite data, *Atmospheric Chemistry and Physics*, 15, 7049–7069, doi:10.5194/acp-15-7049-2015, <https://www.atmos-chem-phys.net/15/7049/2015/>, 2015.
- Van Donkelaar, A., Martin, R. V., Pasch, A. N., Szykman, J. J., Zhang, L., Wang, Y. X., and Chen, D.: Improving the accuracy of daily satellite-derived ground-level fine aerosol concentration estimates for North America, *Environmental science & technology*, 46, 11 971–11 978, 2012.
- Vestreng, V., Mareckova, K., Kakareka, S., Malchykhina, A., and Kukharchyk, T.: Inventory Review 2007. Stage 1 and 2 review. Emission data reported to LRTAP Convention and NEC Directive, review of gridded data and review of PM inventories in Belarus, Republic of Moldova, Russian Federation and Ukraine, 2007.
- Wada, A., Matsueda, H., Sawa, Y., Tsuboi, K., and Okubo, S.: Seasonal variation of enhancement ratios of trace gases observed over 10 years in the western North Pacific, *Atmospheric environment*, 45, 2129–2137, 2011.
- Wecht, K. J., Jacob, D. J., Frankenberg, C., Jiang, Z., and Blake, D. R.: Mapping of North American methane emissions with high spatial resolution by inversion of SCIAMACHY satellite data, *Journal of Geophysical Research: Atmospheres*, 119, 7741–7756, 2014.
- Xiao, Y., Jacob, D. J., Wang, J. S., Logan, J. A., Palmer, P. I., Suntharalingam, P., Yantosca, R. M., Sachse, G. W., Blake, D. R., and Streets, D. G.: Constraints on Asian and European sources of methane from CH<sub>4</sub>-C<sub>2</sub>H<sub>6</sub>-CO correlations in Asian outflow, *Journal of Geophysical Research: Atmospheres*, 109, 2004.
- Yashiro, H., Sugawara, S., Sudo, K., Aoki, S., and Nakazawa, T.: Temporal and spatial variations of carbon monoxide over the western part of the Pacific Ocean, *Journal of Geophysical Research: Atmospheres*, 114, 2009.
- Yevich, R. and Logan, J. A.: An assessment of biofuel use and burning of agricultural waste in the developing world, *Global biogeochemical cycles*, 17, 2003.
- Zeng, G., Wood, S., Morgenstern, O., Jones, N., Robinson, J., and Smale, D.: Trends and variations in CO, C<sub>2</sub>H<sub>6</sub>, and HCN in the Southern Hemisphere point to the declining anthropogenic emissions of CO and C<sub>2</sub>H<sub>6</sub>, *Atmospheric Chemistry and Physics*, 12, 7543–7555, 2012.
- Zeng, G., Williams, J. E., Fisher, J. A., Emmons, L. K., Jones, N. B., Morgenstern, O., Robinson, J., Smale, D., Paton-Walsh, C., and Griffith, D. W. T.: Multi-model simulation of CO and HCHO in the Southern Hemisphere: comparison with observations and impact of biogenic emissions, *Atmospheric Chemistry and Physics*, 15, 7217–7245, doi:10.5194/acp-15-7217-2015, <https://www.atmos-chem-phys.net/15/7217/2015/>, 2015.
- Zhang, J., Smith, K., Ma, Y., Ye, S., Jiang, F., Qi, W., Liu, P., Khalil, M., Rasmussen, R., and Thorneloe, S.: Greenhouse gases and other airborne pollutants from household stoves in China: a database for emission factors, *Atmospheric Environment*, 34, 4537–4549, 2000.
